1  
2  
3  
4  
5  
6  
7  
8  
9  
10  
11  
12  
13  
14  
15  
16  
17  
18  
19  
20  
21  
22  
23  
24  
25  
26  
27  
28  
29  
30  
31  
32  
33  
34  
35  
36

**NO GAMETOPHORES 2 is a novel regulator of the 2D to 3D  
growth transition in the moss *Physcomitrium patens***

**Laura A. Moody<sup>1</sup>, Steven Kelly, Roxaana Clayton, Zoe Weeks, David M. Emms and  
Jane A. Langdale**

Department of Plant Sciences, University of Oxford, South Parks Road, Oxford OX1 3RB,  
UK

<sup>1</sup>For correspondence: [laura.moody@plants.ox.ac.uk](mailto:laura.moody@plants.ox.ac.uk)

## 1 SUMMARY

2

3 The colonization of land by plants was one of the most transformative events in the history of  
4 life on Earth. The transition from water, which coincided with and was likely facilitated by the  
5 evolution of 3-dimensional (3D) growth, enabled the generation of morphological diversity on  
6 land. In many plants, the transition from 2-dimensional (2D) to 3D growth occurs during  
7 embryo development. However, in the early divergent moss *Physcomitrium patens* (formerly  
8 *Physcomitrella patens*), 3D growth is preceded by an extended filamentous phase that can  
9 be maintained indefinitely. Here, we describe the identification of the cytokinin-responsive  
10 *NO GAMETOPHORES 2* (*PpNOG2*) gene, which encodes a shikimate o-  
11 hydroxycinnamoyltransferase. In mutants lacking *PpNOG2* function, transcript levels of  
12 *CLAVATA* and *SCARECROW* genes are significantly reduced, excessive gametophore  
13 initial cells are produced, and buds undergo premature developmental arrest. Our results  
14 suggest that *PpNOG2* functions in the ascorbic acid pathway leading to cuticle formation,  
15 and that *NOG2*-related genes were co-opted into the lignin biosynthesis pathway after the  
16 divergence of bryophytes and vascular plants. We present a revised model of 3D growth in  
17 which *PpNOG2* comprises part of a feedback mechanism that is required for the modulation  
18 of gametophore initial cell frequency. We also propose that the 2D to 3D growth transition in  
19 *P. patens* is underpinned by complex auxin-cytokinin crosstalk that is regulated, at least in  
20 part, by changes in flavonoid metabolism.

21

## 22 KEY WORDS

23

24 3-dimensional growth; *Physcomitrium patens*; land plant evolution; development

25

## 26 INTRODUCTION

27

28 One of the key developmental innovations that facilitated the colonization of land by plants  
29 was the evolution of 3-dimensional (3D) growth. In water dwelling Charophyte algae, the  
30 closest living relatives of land plants, cells only cleave in one or two planes to produce  
31 filaments, mats or branches. By contrast, land plants produce apical initial cells that can  
32 cleave in three (or more) planes to produce the elaborate morphologies that shape the  
33 terrestrial landscape [1,2]. In the vast majority of land plants, the transition from 2-  
34 dimensional (2D) to 3D growth occurs during the development of the embryo. However, in  
35 the early divergent moss *Physcomitrium patens* (formerly known as *Physcomitrella patens*)  
36 [3], the 2D to 3D growth transition occurs twice during the life cycle; initially during the  
37 transition from 2D filamentous growth to the development of 3D gametophores ('leafy

1 shoots'), and then during the development of the embryo [4, 5]. *P. patens* represents an  
2 ideal model organism in which to genetically dissect 3D growth because disruption of the 2D  
3 to 3D growth transition does not cause lethality.

4  
5 The *P. patens* life cycle begins with the germination of haploid spores, which produce apical  
6 initial cells that grow in 1-dimension (1D) to produce filaments of chloronemal cells and then  
7 caulonemal cells, which are collectively known as the protonema [6, 7]. Growth can also  
8 occur in 2D or 3D when side branch initials are produced that develop into either secondary  
9 2D protonema (approx. 95%) or 3D gametophores (approx. 5%) [4, 5, 8]. Side branch initials  
10 that give rise to 3D gametophores are known as gametophore initial cells (or bud initials).  
11 Auxin and cytokinin are required both for the formation of gametophore initial cells and for  
12 the coordination of cell division processes within the developing buds [9-14]. A gametophore  
13 initial cell first divides obliquely to establish an apical and a basal cell, which then both divide  
14 obliquely and perpendicular to the first division plane. An additional two rotating divisions  
15 establish a tetrahedral cell, which can both self-renew and divide in three planes to produce  
16 a mature 3D gametophore bearing leaf-like phyllids arranged in a spiral phyllotaxy, along  
17 with both antheridia and archegonia. Gametes combine during fertilization, leading to the  
18 formation of a diploid sporophyte, which releases haploid spores to restart the life cycle [5].

19  
20 Previous studies have highlighted a number of genes that are essential for the 2D to 3D  
21 growth transition in *P. patens*. For example, orthologues of the Arabidopsis genes  
22 *AINTEGUMENTA*, *PLETHORA* and *BABY BOOM* (*PpAPB1-4*) are necessary and sufficient  
23 for gametophore initial cell formation [8] whereas *DEFECTIVE KERNEL 1* (*PpDEK1*) [15-18]  
24 and *CLAVATA* [19] negatively regulate gametophore initial cell formation and positively  
25 regulate division plane orientation. In contrast, *NO GAMETOPHORES 1* (*PpNOG1*) acts as  
26 a positive regulator of both gametophore initial cell formation and division plane orientation  
27 in developing buds [20]. A current model for *P. patens* 3D growth regulation suggests that  
28 *PpDEK1* and *PpNOG1* act antagonistically to regulate the transcription of the *PpAPB* genes,  
29 which switch on a transcriptional network that facilitates gametophore initial cell formation.  
30 Correct division plane orientation in the developing gametophore is then regulated through a  
31 feedback circuit that comprises *PpNOG1*, *PpDEK1* and *CLAVATA* [20, 21]. Here, we  
32 describe the identification of a further regulator of 3D growth in *P. patens*. The discovery of  
33 *NO GAMETOPHORES 2* (*PpNOG2*), which encodes a shikimate o-  
34 hydroxycinnamoyltransferase, enables the role of auxin-cytokinin crosstalk to be  
35 incorporated into the regulatory pathway.

36  
37

1  
2  
3  
4  
5  
6  
7  
8  
9  
10  
11  
12  
13  
14  
15  
16  
17  
18  
19  
20  
21  
22  
23  
24  
25  
26  
27  
28  
29  
30  
31  
32  
33  
34  
35  
36  
37

## RESULTS AND DISCUSSION

### ***Ppnog2-R* mutants produce supernumerary buds but fail to specify 3D growth**

A forward genetic screen of 9,000 UV-mutagenized lines of the Villersexel (Vx::mCherry) [22] strain of *P. patens*, identified two mutants that exhibit normal 2D filamentous tip growth and branching but fail to transition to 3D growth. In contrast to *P. patens no gametophores 1* – Reference (*Ppnog1-R*), where gametophore initials are suppressed [20], excessive numbers of gametophore initial cells (up to eight times the frequency of wild type) are produced in *no gametophores 2* – Reference (*Ppnog2-R*) mutants (**Figure 1**). Despite the formation of supernumerary initial cells, no gametophores are produced in *Ppnog2-R* mutants because aberrant cell division patterns prevent the formation of a tetrahedral apical cell. In wild type *P. patens*, the first division of the gametophore initial cell is roughly perpendicular to the parent caulonemal cell from which the initial is derived, producing the apical and basal cells (**Figure 2A**). The apical and basal cells then divide obliquely and perpendicular to the first division plane (**Figures 2B and 2C**), with subsequent divisions enabling the establishment of the apical cell (**Figure 2D**). In *Ppnog2-R* mutants, the first oblique division of the gametophore initial cell is correctly oriented (**Figure 2E**), as is the plane of the second division (**Figure 2F**). However, a range of developmental abnormalities occur thereafter. In some cases, the apical initial cell maintained stemness, but then failed to divide in the correct manner (**Figure 2G-I**). In other cases, the newly formed cell acquired an apical cell identity and expanded excessively to generate a bud that was bilaterally symmetrical (**Figure 2J, K**). The pre-defined apical initial cell and the newly expanded apical cell then entered a concurrent cell division programme to produce ‘bifurcating’ twin ‘buds’ that arrested early during development (**Figure 2L**). Without exception, the aberrant cell division patterns exhibited by *Ppnog2-R* mutants prevented the formation of gametophores. The two distinct phenotypes in *Ppnog2-R* mutants, (formation of supernumerary initials and impaired cell division plane orientation) imply that *PpNOG2* negatively regulates gametophore initial cell formation and positively regulates the establishment of 3D growth through correct specification of the gametophore apical cell.

### **The *PpNOG2* gene encodes a SHIKIMATE O-HYDROXYCINNAMOYLTRANSFERASE**

To identify the causative mutation in *Ppnog2-R* mutants, segregating populations were derived from diploid somatic hybrids generated between the infertile *Ppnog2-R* mutant and fertile lines of the Gransden (Gd::GFP) strain [22] (**Figure 3A-C, Figure S1A**). The observed

1 phenotypic segregation ratio of progeny was consistent with meiosis from a tetraploid  
2 (**Figure 3D**), providing mutant and wild-type individuals for gene identification by genome  
3 sequencing. Genomic DNA was prepared from 120 mutant individuals (no 3D growth) and  
4 pooled in equimolar amounts to form the 'mutant pool' and similarly from 120 wild type  
5 individuals (normal 3D growth) to form the 'wild type pool'. Mutant and wild type pools were  
6 then sequenced at 30X coverage. The parental Vx::mCherry and Gd::GFP lines were  
7 sequenced previously [23]. To identify the genetic interval containing the *Ppnog2-R*  
8 mutation, mutant allele frequencies were plotted across all 27 chromosomes in the *P. patens*  
9 genome assembly for 120 mutant individuals and 120 wild type individuals. This revealed a  
10 mutant allele frequency of 1 on chromosome 2 in the mutant pool (**Figure S1B**), and a  
11 corresponding mutant allele frequency of 0.4 in the wild-type pool (**Figure S1C**). A  
12 comprehensive analysis of single nucleotide polymorphisms (SNPs), insertions and  
13 deletions within the defined genetic interval revealed mutations affecting five different  
14 annotated genes (**Figure 3E**). The most likely cause of the *Ppnog2-R* mutant phenotype  
15 was a mutation in either Pp3c2\_27620 or Pp3c2\_29140 because the transcripts of these  
16 mutated genes contained premature termination codons. The mutation in Pp3c2\_27620  
17 results in a nonsynonymous nucleotide substitution (G<sup>82</sup>G), but the frameshift mutation leads  
18 to the introduction of a stop codon in the downstream sequence. Pp3c2\_27620 encodes a  
19 short protein composed of 106 amino acid residues, with no clearly identifiable domain  
20 sequences. A G>A transition generated a premature stop codon (W<sup>541</sup>Ter) in Pp3c2\_29140,  
21 which encodes a shikimate O-hydroxycinnamoyltransferase containing two transferase  
22 domains.

23

24 To determine whether mutations in Pp3c2\_27620 or Pp3c2\_29140 cause the *Ppnog2-R*  
25 mutant phenotype, we first tried to amplify both transcripts from wild type and *Ppnog2-R*  
26 cDNA. Attempts to amplify Pp3c2\_27620 from cDNA were not successful, but the  
27 Pp3c2\_29140 transcript was isolated with ease. The wild type version of the Pp3c2\_29140  
28 transcript was identical to that derived from the v3.3 annotation of the v3.0 *P. patens*  
29 genome assembly. However, two different splice variants of the Pp3c2\_29140 transcript  
30 were detected in the *Ppnog2-R* mutant (**Figure 4A**). The alternatively spliced transcripts  
31 lead to one (v1) or both (v2) of the transferase domains being deleted from the encoded  
32 protein (**Figure 4B**) suggesting that the *Ppnog2-R* mutant phenotype is not caused by the  
33 premature stop codon as such, but by nonsense-associated alternative splicing limiting the  
34 translation of a potentially harmful truncated protein [24]. Intriguingly the same phenomenon  
35 was observed in the *Ppnog1-R* mutant [20]. Collectively, these data suggested that a  
36 mutation in the Pp3c2\_29140 gene was responsible for the *Ppnog2-R* phenotype. To  
37 validate this hypothesis, the rice actin promoter was used to drive the expression of the full-

1 length wild-type coding sequence in the *Ppnog2-R* mutant (**Figure S2**). The mutant  
2 phenotype was fully complemented by the Pp3c2\_29140 gene (**Figure 4C, D**), and therefore  
3 the gene was named *NO GAMETOPHORES 2* (*PpNOG2*).

4 To investigate whether PpNOG2 contains transmembrane (TM) domains, typical of other  
5 transferase proteins in plants, the PpNOG2 protein sequence was scanned for the presence  
6 of putative membrane-spanning regions using TMpred [25]. Three TM domains were  
7 predicted to exist in the PpNOG2 protein. The most well supported model indicated that the  
8 N-terminal end of PpNOG2 resides within the cytosol, and that the C-terminal end is located  
9 on the external surface of the membrane. The model also indicated the presence of a  
10 significant extracellular loop region. Crucially, the highly conserved aspartic acid and  
11 histidine residues that are putative proton acceptors ('active sites') required for transferase  
12 activity [26] are present in PpNOG2 (**Figure S3, Data S1**). To validate the localization of  
13 PpNOG2 *in planta*, the rice actin promoter was used to drive the expression of a PpNOG2-  
14 GFP fusion protein in *P. patens* protoplasts. Consistent with *in silico* predictions, confocal  
15 microscopy revealed that PpNOG2-GFP localizes at or near to the plasma membrane  
16 (**Figure S3**).

17

#### 18 **PpNOG2 orthologues function in the lignin biosynthesis pathway**

19

20 To infer phylogenetic relationships for PpNOG2, orthologous sequences were retrieved from  
21 the genomes of *P. patens*, the liverwort *Marchantia polymorpha*, the lycophyte *Selaginella*  
22 *moellendorffii* and the flowering plants *Oryza sativa* and *Arabidopsis thaliana*. Aligned amino  
23 acid sequences were used to infer a consensus tree, which was rooted on related  
24 sequences from chlorophyte green algae. The topology of the tree revealed that the  
25 *Arabidopsis* orthologue of *PpNOG2* is hydroxycinnamoyl-CoA:shikimate hydroxycinnamoyl  
26 transferase (HCT; At5g48930) (**Figure S4**). In angiosperms, HCT first catalyses the transfer  
27 of alcohols or amines to p-coumaroyl CoA to produce p-coumaroyl shikimate, which  
28 subsequently acts as a substrate for CYP98. CYP98 converts p-coumaroyl shikimate into  
29 caffeoyl shikimate, which then acts as an additional substrate for HCT. Subsequent  
30 downstream steps of the pathway lead to lignin biosynthesis [27]. PpNOG2 orthologs thus  
31 play important roles in phenylpropanoid biosynthesis and in the formation of lignin in  
32 vascular plants.

33

34 The structural features and localization pattern of PpNOG2 are consistent with a functional  
35 HCT protein but it has been reported that monolignols are not present in bryophytes, and  
36 that the HCT substrate caffeoyl shikimate is undetectable in *P. patens* [28]. It has been  
37 shown, however, that the transfer of alcohols or amines to p-coumaroyl CoA by *P. patens*

1 HCT (PpNOG2) produces p-coumaroyl threonate rather than the p-coumaroyl shikimate  
2 produced by HCT in Arabidopsis. Interestingly, both the formation of p-coumaroyl threonate  
3 by PpNOG2, and subsequent modification by PpCYP98A3, occur in an ascorbic acid  
4 pathway, suggesting that these enzymes were co-opted into the lignin biosynthesis pathway  
5 after the divergence of bryophytes and vascular plants.

6 In angiosperms, p-Coumaroyl-CoA lies at the intersection between flavonoid and lignin  
7 biosynthesis. Consequently, disruption of HCT function can divert the metabolic flux into an  
8 overaccumulation of flavonoids, which can inhibit auxin transport [29]. In *P. patens*, the  
9 inhibition of auxin transport by naphthylphthalamic acid (NPA) increases sensitivity of wild-  
10 type plants to auxin at low concentrations and disrupts 3D growth. Although apical cell  
11 identity is maintained, buds undergo premature developmental arrest and resemble those  
12 treated with auxin at high concentrations. The authors suggest that a functional auxin  
13 transport system is necessary to divert exogenously applied auxin and prevent unfavourable  
14 accumulation in cells [30]. Interestingly, developing buds of the *Ppnog2-R* mutant share  
15 remarkable similarities with those affected in auxin homeostasis (**Figure 2I**).

16

17 The initial step of flavonoid biosynthesis is catalysed by chalcone synthases, which are  
18 known to be functional in *P. patens* [31-33]. As such we hypothesize that blocking metabolic  
19 flux into the ascorbic acid pathway in which both *PpNOG2* and *PpCYP98A3* play a role,  
20 would lead to a similar overaccumulation of flavonoids and perturbation of auxin  
21 homeostasis. This hypothesis is consistent with the *Ppnog2-R* mutant phenotype, with the  
22 observation that loss of PpCYP98A3 function leads to the formation of gametophores that  
23 undergo early developmental arrest [28, 34], and the known role of auxin in gametophore  
24 development [30, 35].

25

### 26 ***PpNOG2* acts downstream of *PpNOG1* but upstream of *CLAVATA***

27

28 We previously proposed a model for 3D growth in *P. patens*, in which PpNOG1 and PpDEK1  
29 operate in an antagonistic manner to regulate the expression of *PpAPB* genes. Auxin and  
30 cytokinin response regulators, the transcriptional targets of *PpAPB* genes, then enable the  
31 formation of gametophore initial cells. Subsequently, PpNOG1, PpDEK1 and CLAVATA act  
32 within the gametophore initial to ensure that cell division planes are correctly oriented to  
33 produce a tetrahedral initial cell that can facilitate 3D growth (**Figure S5**) [20, 21]. To  
34 understand where *PpNOG2* fits into this pathway, quantitative RT-PCR experiments were  
35 carried out to determine transcript accumulation profiles of known 3D regulators in wild type  
36 and in *Ppnog1-R* and *Ppnog2-R* mutants.

37

1 To place *PpNOG2* function in the context of *PpNOG1*, which positively regulates both  
2 gametophore initial cell formation and division plane positioning [20], reciprocal quantitative  
3 RT-PCR experiments were performed. *PpNOG1* transcript accumulation was unaffected in  
4 the *Ppnog2-R* mutant (**Figure 5A**) but *PpNOG2* transcript accumulation was dramatically  
5 reduced in the *Ppnog1-R* mutant compared to wild type (**Figure 5B**). *PpNOG1* function  
6 therefore induces the accumulation of *PpNOG2* transcripts (either directly or indirectly).

7  
8 The supernumerary buds formed in the *Ppnog2-R* mutant resemble those of wild type  
9 protonema treated with exogenous cytokinin, but also resemble those affected in auxin  
10 homeostasis [30]. We hypothesise that *PpNOG2* negatively regulates bud initiation by  
11 promoting auxin signalling. To investigate whether *PpNOG2* transcript abundance is  
12 regulated by cytokinin or auxin, transcript levels were quantified in 1-week old wild type  
13 protonemata that had been grown in the presence or absence of the cytokinin analogue 6-  
14 Benzylaminopurine (BAP) or the auxin analogue 1-Naphthaleneacetic acid (NAA). Transcript  
15 levels of *PpNOG2* were dramatically induced by exogenous BAP treatment whereas they  
16 were completely unaffected by NAA treatment (**Figure 5C**). The accumulation of *PpNOG2*  
17 transcripts is thus induced by cytokinin.

18  
19 Transcript levels of the four *PpAPB* transcription factors that are necessary and sufficient to  
20 drive gametophore formation [8] are significantly reduced in *Ppnog1* disruption mutants that  
21 produce fewer gametophore initial cells than wild type [20]. To investigate whether *PpAPB*  
22 transcript levels are correspondingly increased in *Ppnog2-R* mutants that produce excessive  
23 gametophore initial cells, qRT-PCR was carried out using cDNA isolated from 12 d old wild  
24 type and *Ppnog2-R* mutant protonemata. Only *PpAPB1* transcript levels were significantly  
25 increased in *Ppnog2-R* mutants compared to wild type. *PpAPB2* and *PpAPB4* transcript  
26 levels were also increased in the mutant and *PpAPB3* transcript levels decreased, but none  
27 of these differences were significant (**Figure 6A**). Neither the pattern nor level of *PpAPB*  
28 gene expression correlated with the number of gametophore initial cells formed in the  
29 *Ppnog2-R* mutant, and as such any differences from wild-type most likely represent indirect  
30 effects of altered stem cell fate. *PpNOG2* thus operates downstream of the *PpAPB* genes.

31  
32 The overbudding phenotype exhibited by *Ppnog2-R* mutants bears a closer resemblance to  
33 those of *Ppdek1*, *Ppcle*, *Ppclv* and *Pprpk2* disruptant mutants, than to the *Ppnog1-R* mutant  
34 [15-19]. Phenotypic observations alone suggest that *PpNOG1* and *PpDEK1* act at the first  
35 step of the pathway that initiates the 2D to 3D growth transition. Using the same logic, it  
36 would be reasonable to suggest that *PpNOG2*, and then *CLAVATA* operate sequentially at  
37 subsequent stages of development. To better understand the relationships between these



1 different players, transcript accumulation profiles of *PpDEK1* and *CLAVATA* (*PpCLE1-7*,  
2 *PpCLV1A*, *PpCLV1B* and *PpRPK2*) genes were compared in 12 d old wild type protonemata  
3 and in both *Ppnog1-R* and *Ppnog2-R* mutants. Of the 11 genes examined (see methods),  
4 only three showed transcript levels that were significantly different between wild-type and  
5 either *Ppnog1-R* or *Ppnog2-R* mutants. *PpCLE4* and *PpCLE5* levels were significantly  
6 reduced in both *Ppnog1-R* and *Ppnog2-R* mutants compared to wild type, whereas *PpCLE7*  
7 levels were significantly increased in *Ppnog1-R* but not in *Ppnog2-R* mutants (**Figure 6B**).  
8 *PpCLE7* transcript levels are thus suppressed by PpNOG1, whereas PpCLE4 and *PpCLE5*  
9 levels are induced by both *PpNOG1* and *PpNOG2*.

10

### 11 **SCARECROW transcription factors are markers of 3D growth**

12

13 The first visual marker of the 3D growth transition in *P. patens* is an asymmetric cell division  
14 in the gametophore initial cell. To identify molecular markers of this event, we took a  
15 candidate gene approach, selecting genes based on their documented gene expression  
16 profiles in *P. patens* [36] and their known roles in asymmetric cell divisions in angiosperms.  
17 Transcript accumulation profiles were quantified in 12 d old protonemata of wild-type, plus  
18 both *Ppnog1-R* and *Ppnog2-R* mutants, for *SCARECROW 1* (*PpSCR1*), *SCARECROW 2*  
19 (*PpSCR2*) and *SCARECROW 3* (*PpSCR3*). The *PpSCR3* transcript were not detected in 12  
20 d old protonemata and were therefore not investigated further. However, quantification of  
21 *PpSCR1* transcript levels revealed a significant reduction in both *Ppnog1-R* and *Ppnog2-R*  
22 mutants (**Figure 6C**) whereas levels of *PpSCR2* transcript were significantly reduced in the  
23 *Ppnog1-R* mutant but not in the *Ppnog2-R* mutant (**Figure 6D, Figure S6**).

24

25 It has been reported that SCR genes regulate auxin-cytokinin crosstalk in angiosperms [37,  
26 38]. Given the opposing bud initiation phenotypes in *Ppnog1-R* and *Ppnog2-R* mutants, our  
27 results suggest that *PpSCR1* and *PpSCR2* modulate auxin-cytokinin crosstalk at different  
28 stages of the 2D to 3D growth transition, both downstream of *PpNOG1* (*PpSCR2*) and  
29 downstream of *PpNOG2* (*PpSCR1*).

30

### 31 **A revised model for 3D growth regulation in *P. patens***

32

33 Results reported here add a new dimension to current models for the 3D growth transition in  
34 *P. patens* (**Figure 7**). As reported previously, we propose that PpNOG1 acts  
35 antagonistically to PpDEK1 at the earliest stage of 3D growth initiation to induce the  
36 degradation of a repressor of *PpAPB* activity. The subsequent activation of cytokinin  
37 biosynthetic genes, proposed targets of the *PpAPB* genes, enables the formation of

1 gametophore initial cells. Based on the findings reported here, we propose that PpNOG2  
2 comprises part of a feedback mechanism that is required for the modulation of gametophore  
3 initial cell frequency. Our results suggest that the 2D to 3D growth transition is underpinned  
4 by complex auxin-cytokinin crosstalk that may be regulated, at least in part, by changes in  
5 flavonoid metabolism. In response to elevated cytokinin levels, we propose that PpNOG2  
6 activates an auxin response that is dependent on CLAVATA signalling. The correct  
7 modulation of local auxin and cytokinin concentrations ensure that division planes within  
8 developing buds are correctly oriented, and that unnecessary bud initiation is eliminated.

9

## 10 **ACKNOWLEDGEMENTS**

11

12 We are grateful to Pierre-François Perroud for providing the Vx::mCherry and the Gd::GFP  
13 marker lines; Yuji Hiwatashi for providing the pZAG1 plasmid; and Andrew Cuming for  
14 advice on UV-mediated mutagenesis. The work was funded by BBSRC (BB/M020517/1)  
15 grants (to J.A.L.) and by Royal Society University Research Fellowships to L.A.M.  
16 (URFR1\191310) and S.K. (UF140484).

17

## 18 **AUTHOR CONTRIBUTIONS**

19

20 L.A.M. conducted the experiments, with technical assistance from R.C; L.A.M., S.K., and  
21 J.A.L. conceived and designed the study; S.K. carried out the bioinformatics; Z.W., D.E., and  
22 J.A.L. assisted L.A.M. with Phylogenetic tree construction; and L.A.M. and J.A.L. wrote the  
23 manuscript.

24

## 25 **DECLARATION OF INTERESTS**

26

27 The authors declare no competing interests.

28

29

30

31

32

33

34

35

36

37

1

2

3

4

## 5 **FIGURE LEGENDS**

6

### 7 **Figure 1. *Ppnog2-R* mutants produce supernumerary buds**

8 (A-D) 1 month old Vx::mCherry (WT) (A and B) and *Ppnog2-R* (C and D) plants showing the  
9 presence (WT, A) and absence (*Ppnog2-R*, C) of gametophores and the protonemal  
10 filaments (B and D) with supernumerary buds visible in *Ppnog2-R* (D). (E) Mean number of  
11 gametophores per culture (n = 10) ± SEM (WT = 73.7 ± 4.90; *Ppnog2-R* = 0 ± 0; t test p <  
12 0.05 \*\*\*). Scale bars, 1 cm (A and C) and 50 µm (B and D).

13

### 14 **Figure 2. *Ppnog2-R* mutants fail to specify 3D growth**

15 (A-L) Propidium Iodide stained Vx::mCherry (WT) (A-D) and *Ppnog2-R* (E-L) buds at 2 (A  
16 and E), 3 (B, F, J and K), 4/5 (C and G) and 5+ (D, H, I and L) cell stages. Scale bars = 25  
17 µm; •  
18 = gametophore initial. Yellow arrows indicate the most recent division in each bud. Yellow  
19 asterisks (\*) denote cell in *Ppnog2-R* (J and K) that undergoes abnormal swelling.

20

### 21 **Figure 3. Identification of the *PpNOG2* locus by somatic hybridization combined with 22 bulk segregant analysis**

23 (A-C) Representative images of 1-month old *Ppnog2-R* plant without gametophores (A),  
24 Vx::mCherry plant with gametophores (B) and *Ppnog2-R/Gd::GFP* hybrid with  
25 gametophores (C). Scale bars = 1 cm. (D) Phenotypic analysis of spore progeny derived  
26 from a single *Ppnog2-R/Gd::GFP* hybrid line (no. 2). Numbers are consistent with meiosis  
27 from a tetraploid sporophyte. Chi-square P<0.05 \*\*\*. E) Candidate genes on Chromosome 2  
28 within the genetic interval containing the *PpNOG2* genetic locus. See also **Figure S1**.

29

### 30 **Figure 4. The *PpNOG2* gene encodes a SHIKIMATE O- 31 HYDROXYCINNAMOYLTRANSFERASE**

32 (A) *PpNOG2* transcripts in Vx::mCherry (Vx\_Pp3c2\_29140) and *Ppnog2-R* (v1 and v2).  
33 Exons (blocks) are separated by introns (lines); splicing patterns and in-frame stop codons  
34 (\*) are indicated. Scale = 1kb. (B) PpNOG2 protein in Vx::mCherry (Vx\_PpNOG2) and both  
35 variants of PpNOG2 protein in the *Ppnog2-R* mutant. *Ppnog2-R\_PpNOG2v1* contains an  
36 intact Transferase 1 (T1) domain but Transferase 2 (T2) is absent. In *Ppnog2-  
37 R\_PpNOG2v2*, T1 is absent and T2 is heavily truncated. The number of amino acid residues

1 is indicated to the right of each image. (C, D) Representative images of 1-month old  
2 *Ppnog2-R* (C) and *Ppnog2-R* complemented with pAct::*PpNOG2-mGFP* (D). Scale bars = 1  
3 mm. See also **Figure S2-S4** and **Data S2**.

4

5

### 6 **Figure 5. *PpNOG2* acts downstream of *PpNOG1* and is regulated by cytokinin**

7 (A-C) Relative transcript levels in 12 d old protonemata: *PpNOG1* in WT and *Ppnog2-R* (A),  
8 *PpNOG2* in WT and *Ppnog1-R* (B), *PpNOG2* in wild-type  $\pm$  BAP or NAA (C). ANOVA, \*\*,  
9  $p < 0.01$ ; \*\*\*,  $p < 0.001$ . See also **Figure S5**.

10

### 11 **Figure 6. *PpNOG2* act upstream of *CLAVATA* and *SCARECROW* genes**

12 (A-D) Relative transcript levels in 12 d old protonemata: *PpAPB1-4* in Vx::mCherry (WT) and  
13 *Ppnog2-R* (A); *PpCLE4*, *PpCLE5* and *PpCLE7* in WT, and in *Ppnog1-R* and *Ppnog2-R*  
14 mutants (B); *PpSCR1* (C) and *PpSCR2* (D) in WT, and in *Ppnog1-R* and *Ppnog2-R* mutants.  
15 Statistical analysis: t-test,  $P < 0.05$  \*\*\* (A); ANOVA,  $p < 0.01$  \*\*,  $p < 0.001$  \*\*\* (B-D). See also  
16 **Figure S6**.

17

### 18 **Figure 7. Model for 3D growth regulation in *P. patens***

19 A) Proposed involvement of *PpNOG2* in the ascorbic acid pathway leading to cuticle  
20 formation. When *PpNOG2* is absent, metabolic flux is directed through to flavonoid  
21 biosynthesis through enhanced chalcone synthase (CHS) activity. Increased flavonoids  
22 cause inhibition of auxin transport and suppression of the auxin response. B) Model for  
23 *PpNOG2* function in the context of 3D growth regulation: *PpNOG1* and *PpDEK1* operate  
24 antagonistically to induce the degradation of a repressor of *PpAPB* activity. Activation of  
25 cytokinin biosynthesis initiates bud development and induces *PpNOG2* transcription.  
26 *PpNOG2* then modulates auxin-cytokinin crosstalk, which is dependent on *CLAVATA*  
27 signalling. This ensures that further bud development is prevented, and that division planes  
28 within developing buds are correctly oriented.

29

## 30 **METHODS**

31

## 32 **CONTACT FOR REAGENT AND RESOURCE SHARING**

33

34 Further information and requests for resources and reagents should be directed to and will  
35 be fulfilled by the Lead Contact, Laura Moody ([laura.moody@plants.ox.ac.uk](mailto:laura.moody@plants.ox.ac.uk)). Please note  
36 that the transfer of transgenic *P. patens* lines will be governed by an MTA and will be  
37 dependent on appropriate import permits being acquired by the receiver.

1

2

3

4

5

## 6 **EXPERIMENTAL MODEL AND SUBJECT DETAILS**

7

### 8 **Plants**

9 Vx::mCherry and Gd::GFP marker lines were obtained from Pierre-François Perroud [22],  
10 and the *Ppnog1-R* line was generated previously [20]. Plants were propagated under sterile  
11 conditions on BCD or BCDAT medium. BCD medium contained 250mg/L MgSO<sub>4</sub>·7H<sub>2</sub>O,  
12 250mg/L KH<sub>2</sub>PO<sub>4</sub> (pH6.5), 1010mg/L KNO<sub>3</sub>, 12.5mg/L FeSO<sub>4</sub>·7H<sub>2</sub>O, 0.001% Trace Element  
13 Solution (TES – 0.614mg/L H<sub>3</sub>BO<sub>3</sub>, 0.055mg/L AlK(SO<sub>4</sub>)<sub>2</sub>·12H<sub>2</sub>O, 0.055mg/L CuSO<sub>4</sub>·5H<sub>2</sub>O,  
14 0.028mg/L KBr, 0.028mg/L LiCl, 0.389mg/L MnCl<sub>2</sub>·4H<sub>2</sub>O, 0.055mg/L CoCl<sub>2</sub>·6H<sub>2</sub>O, 0.055mg/L  
15 ZnSO<sub>4</sub>·7H<sub>2</sub>O, 0.028mg/L KI and 0.028mg/L SnCl<sub>2</sub>·2H<sub>2</sub>O) and 8g/L agar, supplemented with  
16 1 mM CaCl<sub>2</sub>. BCDAT medium was additionally supplemented with 1 mM ammonium tartrate  
17 [39]. Plants were grown at 24°C with a 16 h: 8 h, light (300mmol m<sup>-2</sup> s<sup>-1</sup>): dark cycle. To  
18 induce sporophytes, tissues were grown for 3-6 months on peat plugs at 16°C with an 8 h:  
19 16 h, light (300mmol m<sup>-2</sup> s<sup>-1</sup>): dark cycle. Sporangia were sterilized in 20% Parozone bleach  
20 for 15 min at room temperature and washed three times in sterile water. Sporangia were  
21 ruptured using a sterile pipette tip, and the released spores were plated onto cellophane  
22 overlaid BCDAT medium and grown at 24°C with a 16 h: 8 h, light (300mmol m<sup>-2</sup> s<sup>-1</sup>): dark  
23 cycle.

24

## 25 **METHOD DETAILS**

26

### 27 **UV mutagenesis and screening**

28 1% Driselase was prepared in 8% mannitol and incubated for 15 min at room temperature.  
29 The solution was centrifuged for 3 min at 3,300 xg and then filter sterilized without disrupting  
30 the pellet. 7-day old Vx::mCherry protonemata was harvested from cellophane overlaid  
31 BCDAT medium, added to the 1% Driselase solution and incubated, with gentle agitation, for  
32 40 min. The cell suspension was then filtered through a 40 µm cell strainer into a round  
33 bottomed tube and centrifuged for 3 min at 120 xg at room temperature with no braking. The  
34 pelleted cells were washed twice with 2 x 6 ml 8% mannitol, and then resuspended in 6 ml  
35 8% mannitol. Cell density was determined using a haemocytometer and adjusted to a  
36 density of 5x10<sup>4</sup> cells mL<sup>-1</sup>. 1 mL cell suspension was plated onto cellophane overlaid

1 BCDATG medium (BCDAT supplemented with 10 mM CaCl<sub>2</sub>, 6% mannitol and 0.5%  
2 glucose). Plates containing protoplasts were administered a dose of UV radiation using a  
3 Stratalinker UV Crosslinker (75000 mJ) and then incubated at 24°C in the dark for 48 h to  
4 prevent photoactivatable DNA damage repair. Regenerating protoplasts were incubated in  
5 standard light conditions for one week. Cellophane discs were then transferred to BCDAT  
6 medium and grown for one week until regenerating protoplasts were clearly visible.  
7 Regenerating protoplasts were transferred to individual wells of 24-well plates containing  
8 BCD medium and incubated under standard growth conditions until ready for phenotypic  
9 analyses (typically two months).

10

### 11 **Microscopy**

12 Fluorescence microscopy was carried out using a Leica SP5 confocal microscope. A 63x  
13 water immersive lens was used for all imaging. Propidium iodide (PI) was excited at 488 nm  
14 with 30% laser power and detected with at 600-630 nm. Tissues were submerged in 10  
15 µg mL<sup>-1</sup> PI for 1-5 min and then mounted on a slide in a drop of water. All other images were  
16 captured using a Leica DMRB microscope or a Leica M165C stereomicroscope, equipped  
17 with a QImaging Micropublishing 5.0 RTV camera.

18

### 19 **Somatic hybridization and segregation analysis**

20 Protoplasts were isolated from both *Ppnog2-R* and Gd::GFP as described above, and  
21 adjusted to a cell density of 1x10<sup>6</sup> cells mL<sup>-1</sup> in 8% mannitol. 1x10<sup>6</sup> cells of each line were  
22 combined in a single round bottomed tube and mixed gently. Protoplasts were pelleted after  
23 centrifugation for 3 min at 120xg at room temperature with no braking, and then  
24 resuspended in 250 µl protoplast wash (PW) solution (10 mM CaCl<sub>2</sub> and 8.5% mannitol) and  
25 750 µl PEG/F (5 mM CaCl<sub>2</sub> and 50% PEG 6000 (w/v)), and left to incubate at room  
26 temperature for 40 min. 1.5 mL of PW solution was then added to the tubes, mixed gently  
27 and left to incubate at room temperature for 10 min. An additional 10 mL PW solution was  
28 added to the cell suspension, and left to incubate for a further 10 min. This step was  
29 repeated. Protoplasts were then centrifuged at 120xg for 3 min at room temperature with no  
30 braking. The supernatant was removed, and the pellet resuspended in 3 mL 8% mannitol  
31 prior to plating 1 mL onto each of three cellophane overlaid petri dishes containing BCDATG  
32 medium. Plates were incubated in the dark for 48 h and then transferred to standard growth  
33 conditions. After one week, cellophane discs were removed and then transferred to BCDAT  
34 medium supplemented with both 50 µg mL<sup>-1</sup> G418 and 20 µg mL<sup>-1</sup> hygromycin B, to select for  
35 stable *Ppnog2-R/Gd::GFP* diploid hybrids (adapted from [40]).

36 Sporophyte induction was performed as described above. Spores were germinated on  
37 cellophane overlaid BCDAT medium for two weeks. Regenerating sporelings were then

1 transferred to individual wells of 24-well tissue culture plates containing BCD medium, and  
2 grown for two months under standard growth conditions. Phenotypic characterisation of the  
3 lines was then carried out. 120 of the lines that failed to initiate 3D growth contributed to the  
4 mutant pool, and 120 of the lines could initiate 3D growth contributed to the wild type pool.

5  
6  
7

## 8 **Isolation of genomic DNA and sequencing**

9 Genomic DNA was extracted from 7 d old protonemata grown on cellophane overlaid  
10 BCDAT medium using the CTAB method [41]. Tissues were first ground in liquid nitrogen,  
11 suspended in 500 µl CTAB buffer (1.5% CTAB, 1.05 M NaCl, 75 mM Tris-HCl, 15 mM EDTA  
12 pH8.0) and incubated at 65°C for 10 min. An equal volume of chloroform:isoamylalcohol  
13 (24:1) was added to the suspension, which was vortexed and centrifuged at 13,000 rpm for  
14 10 min. The upper aqueous layer was transferred to a fresh tube, mixed with 0.7 volumes of  
15 isopropanol and centrifuged at 13,000 rpm for 10 min. Pellets were then washed with 70%  
16 ethanol, allowed to air dry and resuspended in 30-50 µl sterile water. Genomic DNA was  
17 extracted from individuals and then pooled in equimolar amounts to generate the mutant  
18 (120 individuals, 3 µg total) and wild type pools (120 individuals, 3 µg total). DNA samples  
19 were sequenced using a BGISEQ-500 platform (100 bp PE read lengths) at the Beijing  
20 Genomics Institute (BGI).

21

## 22 **Read processing and variant calling**

23 Raw reads were obtained from BGI and subjected to quality filtering using Trimmomatic [42]  
24 to eliminate contaminants, in addition to low quality bases and read pairs. Common Illumina  
25 adaptors were identified within sequences using Trimmomatic and the read processing  
26 settings LEADING:20 TAILING:20 SLIDINGWINDOW:5:20 MINLEN:50. BWA-MEM [43] was  
27 used to map the trimmed quality filtered paired-end read libraries to the *P. patens* genome  
28 (version Ppatens\_318\_v3) obtained from Phytozome V12. Any duplicated reads were  
29 removed, mapped reads were realigned around insertions or deletions, and variants called  
30 according to best practice guidelines from GATK using GATK v3.6 [44].

31

## 32 **Candidate gene discovery through bulk segregant analysis**

33 A previous comparison of the sequence data from the Gd::GFP and Vx::mCherry parental  
34 strains identified a set of SNPs that distinguished the two strains [20, 23]. Bulk segregant  
35 analysis was carried out by mapping read from both wild type and mutant pools to the *P.*  
36 *patens* reference genome. The allele frequencies were calculated by performing  
37 comparative analyses of the strain-distinguishing variants in both pools. Strain-distinguishing

1 variants were used for analysis if: 1) the coverage depth in both the wild type and mutant  
2 pools was > 0.5 and < 2 times the mean coverage depth and: 2) the variant quality was >  
3 500. Allele frequencies were used to identify the chromosomal region linked to the mutant  
4 allele. To confirm the presence of the premature termination codon in the PpNOG2 gene in  
5 the Ppnog2-R mutant, the full-length transcript was amplified using the primers NOG2StSall  
6 and NOG2-StopHindIII (**Data S2**), sequenced and compared to the wild type version.

### 9 ***Physcomitrium patens* transformation**

10 Prior to transformation, 10-15 µg of plasmid DNA (pAct:*PpNOG2*-mGFP) was linearised  
11 using KpnI and purified. All of the solutions required for the transformation procedure were  
12 prepared immediately before commencing transformation. Initially, 2g polyethylene glycol  
13 6000 (previously autoclaved in a flat-bottom autoclavable vial) was melted in a microwave. 5  
14 ml filter sterilised mannitol/Ca(NO<sub>3</sub>)<sub>2</sub> solution (7.2% mannitol, 100 mM Ca(NO<sub>3</sub>)<sub>2</sub>, 10 mM Tris  
15 pH8.0) was then added to the molten PEG and allowed to incubate at room temperature  
16 until required (approx. 2 h). Protoplasts were isolated from *nog2-R* (or Gransden wild type)  
17 as described above in '*UV mutagenesis and screening*'. Following cell density determination  
18 using a haemocytometer, protoplasts were resuspended in MMM (0.5 M mannitol, 15 mM  
19 MgCl<sub>2</sub>, 0.1% MES pH5.6) to achieve a final cell density of 1.5x10<sup>6</sup> cells mL<sup>-1</sup>. 10-15 µg of  
20 linearised construct was added to a round bottomed tube (non-linearised DNA was used for  
21 transient transformations). 300 µL protoplast suspension and 300 µL PEG solution were  
22 then added to the tubes in drops and mixed by gently tilting the tubes. The samples were  
23 heat-shocked in a waterbath for 5 min at 45°C and incubated for an additional 5 min at room  
24 temperature. 300 µL 8% mannitol was added to each tube five times at 4-6 min intervals with  
25 mixing after each addition. 1 mL 8% mannitol was then added to each tube five times at 4-6  
26 min intervals with mixing after each addition. The tubes were then centrifuged for 3 min at  
27 120 xg at room temperature with no braking to pellet the protoplasts. For transient  
28 transformations, protoplasts were resuspended in liquid BCD medium containing 10 mM  
29 CaCl<sub>2</sub>, 8% mannitol and 0.5% glucose. Tubes were then wrapped in aluminium foil to protect  
30 them from light and incubated overnight at 24°C. For stable transformations, protoplasts  
31 were resuspended gently in 3 mL 8% mannitol. 1 mL of the protoplast suspension was then  
32 added to each of three cellophane overlaid plates containing BCDATG medium. Protoplasts  
33 were incubated at 24°C in the dark for 24-48 h, and then grown under standard conditions  
34 for one week. Cellophane discs were then transferred to BCDAT plates supplemented with  
35 antibiotics and grown for one week. Cellophane discs were then transferred to BCDAT  
36 (without antibiotics) and grown for a further week. Using forceps, regenerating lines were  
37 then transferred to BCD medium supplemented with antibiotics for longer term growth.



1

## 2 **Generation of *Ppnog2-R* complementation lines**

3 The full-length *PpNOG2* coding sequence (excluding the stop codon) was amplified from *P.*  
4 *patens* Villersexel wild-type protonemata cDNA using the primers NOG2StSall and NOG2-  
5 StopHindIII and ligated into Sall/HindIII cut pZAG1 plasmid (a gift from Yuji Hiwatashi). The  
6 resultant construct, pAct:*PpNOG2*-mGFP (**Figure S4**), was linearised using KpnI and  
7 transformed into protoplasts isolated from *Ppnog2-R* mutants. Stable transformants were  
8 selected using 100 µg mL<sup>-1</sup> Zeocin. Primer sequences are listed in (**Data S2**).

## 9 **Quantitative RT-PCR**

10 Total RNA was isolated using the RNeasy Mini kit (QIAGEN). 1 µg RNA was DNase treated  
11 (Turbo DNase, Ambion) and cDNA was subsequently synthesised using Superscript III  
12 Reverse Transcriptase (Invitrogen). Primer pairs were designed to amplify ~100-150bp  
13 fragment of each of the genes of interest. Genes examined included *PpDEK1*, *PpSHR1*,  
14 *PpSHR2*, *PpSCR1*, *PpSCR2*, *PpSCR3*, *PpIMK3A*, *PpCLE1*, *PpCLE2*, *PpCLE3*, *PpCLE4*,  
15 *PpCLE5*, *PpCLE6*, *PpCLE7*, *PpCLV1A*, *PpCLV1B* and *PpRPK2* (for primer sequences see  
16 **Data S2**). Transcripts for the following genes were undetectable in wild type, and in both  
17 *Ppnog1-R* and *Ppnog2-R* mutants and were eliminated from further studies: *PpSHR1*,  
18 *PpSHR2*, *PpSCR3*, *PpCLE1*, *PpCLE2*, *PpCLE6*, *PpCLV1A* and *PpCLV1B*. Amplification  
19 was detected on a StepOne™ Real-Time PCR System (Applied Biosystems) using SYBR  
20 Green (Life Technologies). Cycling conditions comprised 95°C for 5 min, and 40 cycles of  
21 95°C for 15 s and 60°C for 1 min. Minus RT controls were checked for genomic DNA  
22 contamination using control primer pairs. To test whether *PpNOG2* expression was affected  
23 by either auxin and/or cytokinin treatment, 7 d old wild type Vx protonemata (grown on  
24 cellophane overlaid BCD) was transferred to BCD medium supplemented with 100 nm BAP,  
25 100 nm NAA or 100 nm BAP/100 nm NAA. Controls (no BAP or NAA) were also included.  
26 Tissues were grown for 3 d and then material was harvested for RNA isolation. For all other  
27 experiments, RNA was isolated from protonemata grown on cellophane overlaid BCD  
28 medium under standard conditions for 12 d.

29

## 30 **Phylogenetic analysis**

31 The complete set of predicted proteomes for *Arabidopsis thaliana*, *Oryza sativa*, *Selaginella*  
32 *moellendorffii*, *Marchantia polymorpha*, *Physcomitrium patens* (formerly *Physcomitrella*  
33 *patens*), *Ostreococcus lucimarinus*, and *Micromonas pusilla* in Phytozome version 12.1 were  
34 subject to orthogroup inference using Orthofinder [45, 46]. The orthogroup containing the  
35 *PpNOG2* gene was identified and the constituent sequences aligned using MEGA X [47].  
36 Several of the gene models for *Selaginella moellendorffii* and *Marchantia polymorpha* were  
37 checked, manually corrected and added to the alignment. The alignment was subjected to

1 initial testing using IQTREE [48]. Failed sequences were then removed from the alignment.  
2 The best-fitting model parameters (Dayhoff) were estimated from the edited alignment and a  
3 consensus phylogenetic tree was estimated from 1000 bootstrap replicates. The data were  
4 imported into ITOL [49] to generate the pictorial representation. The phylogenetic tree for the  
5 SCR genes was constructed in the same manner.

6

7

8

## 9 **QUANTIFICATION AND STATISTICAL ANALYSES**

10

### 11 **Experimental design, sampling and statistical methods**

12 qRT-PCR experiments were carried out using three technical replicates for each of three  
13 independent biological samples, alongside water controls. Ct values were calculated from  
14 raw amplification data using the Real-time PCR Miner software ([http://www.  
15 ewindup.info/miner/](http://www.ewindup.info/miner/)). The mean Ct value between the three technical replicates was then  
16 calculated. Fold changes in gene expression were calculated relative to controls using the  $2^{-\Delta CT}$   
17  $\Delta CT$  method [50]. Two genes were used as constitutive controls: EF1alpha (Pp1s84\_186V6)  
18 and ACT7 (Pp1s198\_154V6). An ANOVA test (or t-test if appropriate) was performed to  
19 determine whether relative expression changes were statistically significant.

20 A phenotypic segregation analysis was performed on the progeny derived from a single  
21 *Ppnog2-R/Gd* hybrid line. 660 individuals were phenotypically scored, and a Chi-square test  
22 was performed to check for alignment with the expected 1:4:1 segregation ratio.

23

### 24 **DATA AND SOFTWARE AVAILABILITY**

25 The accession number for the raw genome sequence reads for the Gd::GFP and  
26 Vx::mCherry parental lines is EBI ArrayExpress: E-MTAB-5096. The accession number for  
27 the raw genome sequence reads reported in this paper is EBI ArrayExpress: E-MTAB-7502.  
28 The accession numbers for the sequences of full length *PpNOG2* cDNA plus the two  
29 different splice variants in *nog2-R* mutants reported in this paper are NCBI: MT266984,  
30 MT266985, and MT266986, respectively.

31

### 32 **SUPPLEMENTAL INFORMATION**

33

#### 34 **Figure S1. Bulk segregant analysis via somatic hybridization**

35 (A) *Ppnog2-R* and Gd::GFP haploid lines and a *Ppnog2-R/Gd::GFP* diploid line. Images  
36 show green fluorescent protein (GFP, green), mCherry (red), chlorophyll autofluorescence

1 (blue) and a merge of all four. Scale = 25  $\mu\text{m}$ . (B, C) Allele frequency plots for *Ppnog2-R* (B)  
2 and WT (C) segregants on chromosome 2 of *P. patens*.

3

#### 4 **Figure S2. Generation of *PpNOG2* complementation lines**

5 Schematic diagram of the pAct::PpNOG2-GFP construct that was used to complement  
6 *Ppnog2-R* mutants. The construct was targeted to the 213 locus as shown.

7

8

#### 9 **Figure S3. The PpNOG2 protein localizes at or near to the plasma membrane**

10 A) Transient expression of pAct::PpNOG2-GFP in *P. patens* protoplasts. Images show green  
11 fluorescent protein (GFP, green), chlorophyll autofluorescence and a merge of both. Scale =  
12 10  $\mu\text{m}$ . B) Schematic of the PpNOG2 protein topology as predicted by TMpred (see **Data S2**  
13 for further details). Three transmembrane (TM) domains are predicted to exist, in addition to  
14 an extracellular loop region. The putative location of conserved aspartic acid (D) and  
15 histidine (H) have been indicated.

16

#### 17 **Figure S4. Maximum-likelihood phylogenetic analysis of PpNOG2-related proteins**

18 The tree was rooted using chlorophyte sequences, and numbers correspond to bootstrap  
19 values. PpNOG2 (Pp3c2\_29140) has been highlighted in red.

20

#### 21 **Figure S5. Previous model for 3D growth regulation in *P. patens***

22 Previously proposed model for 3D growth regulation suggests that PpNOG1 and PpDEK1  
23 operate antagonistically to regulate the transcription of PpAPB genes, and then cooperate  
24 with CLAVATA to deliver correct cytokinin signalling outputs; prevent ectopic initiation of  
25 buds and ensure division planes are correctly oriented.

26

#### 27 **Figure S6. Maximum-likelihood phylogenetic analysis of SCR-related proteins**

28 The tree was rooted to *P. patens* sequences, which form an outgroup. Bootstrap values are  
29 shown on branches. Green shading indicates the AtSCL23 clade and yellow shading  
30 indicates the AtSCR clade.

31

#### 32 **REFERENCES**

- 33 1. Niklas, K.J. (2000). The Evolution of Plant Body Plans—A Biomechanical Perspective.  
34 *Ann. Bot.* 85, 411–438.
- 35 2. Graham, L.E., Cook, M.E., and Busse, J.S. (2000). The origin of plants: body plan  
36 changes contributing to a major evolutionary radiation. *Proc. Natl. Acad. Sci. U. S. A.*  
37 97, 4535–40.

- 1 3. Rensing, S.A., Goffinet, B., Meyberg, R., Wu, S.-Z., and Bezanilla, M. The Moss  
2 Physcomitrium (Physcomitrella) patens: A Model Organism for Non-Seed Plants.  
3 Plant Cell 32, 1361-1376.
- 4 4. Cove, D.J., and Knight, C.D. (1993). The Moss Physcomitrella patens, a Model  
5 System with Potential for the Study of Plant Reproduction. Plant Cell 5, 1483–1488.
- 6 5. Harrison, C.J., Roeder, A.H.K., Meyerowitz, E.M., and Langdale, J.A. (2009). Local  
7 cues and asymmetric cell divisions underpin body plan transitions in the moss  
8 Physcomitrella patens. Curr. Biol. 19, 461–71.
- 9 6. Cove, D., Bezanilla, M., Harries, P., and Quatrano, R. (2006). MOSSES AS MODEL  
10 SYSTEMS FOR THE STUDY OF METABOLISM AND DEVELOPMENT. Annu. Rev.  
11 Plant Biol. 57, 497–520.
- 12 7. Menand, B., Calder, G., and Dolan, L. (2007). Both chloronemal and caulonemal cells  
13 expand by tip growth in the moss Physcomitrella patens. J. Exp. Bot. 58, 1843–1849.
- 14 8. Aoyama, T., Hiwatashi, Y., Shigyo, M., Kofuji, R., Kubo, M., Ito, M., and Hasebe, M.  
15 (2012). AP2-type transcription factors determine stem cell identity in the moss  
16 Physcomitrella patens. Development 139, 3120–3129.
- 17 9. Bopp, M., and Brandes, H. (1964). Versuche zur Analyse der Protonemaentwicklung  
18 der Laubmoose. Planta 62, 116–136.
- 19 10. Brandes, H., and Kende, H. (1968). Studies on Cytokinin-Controlled Bud Formation in  
20 Moss Protonemata. Plant Physiol. 43, 827–837.
- 21 11. Ashton, N.W., Grimsley, N.H., and Cove, D.J. (1979). Analysis of gametophytic  
22 development in the moss, Physcomitrella patens, using auxin and cytokinin resistant  
23 mutants. Planta 144, 427–435.
- 24 12. Reski, R., and Abel, W.O. (1985). Induction of budding on chloronemata and  
25 caulonemata of the moss, Physcomitrella patens, using isopentenyladenine. Planta  
26 165, 354–8.
- 27 13. Schulz, P., Reski, R., Maldiney, R., Laloue, M., and Schwartzberg, K. v. (2000).  
28 Kinetics of Cytokinin Production and Bud Formation in Physcomitrella: Analysis of  
29 Wild Type, a Developmental Mutant and Two of Its ipt Transgenics. J. Plant Physiol.  
30 156, 768–774.
- 31 14. von Schwartzberg, K., Nunez, M.F., Blaschke, H., Dobrev, P.I., Novak, O., Motyka,  
32 V., and Strnad, M. (2007). Cytokinins in the Bryophyte Physcomitrella patens:  
33 Analyses of Activity, Distribution, and Cytokinin Oxidase/Dehydrogenase  
34 Overexpression Reveal the Role of Extracellular Cytokinins. PLANT Physiol. 145,  
35 786–800.

- 1 15. Perroud, P.-F., Demko, V., Johansen, W., Wilson, R.C., Olsen, O.-A., and Quatrano,  
2 R.S. (2014). Defective Kernel 1 (DEK1) is required for three-dimensional growth in  
3 *Physcomitrella patens*. *New Phytol.* 203, 794–804.
- 4 16. Demko, V., Perroud, P.-F., Johansen, W., Delwiche, C.F., Cooper, E.D., Remme, P.,  
5 Ako, A.E., Kugler, K.G., Mayer, K.F.X., Quatrano, R., *et al.* (2014). Genetic Analysis  
6 of DEFECTIVE KERNEL1 Loop Function in Three-Dimensional Body Patterning in  
7 *Physcomitrella patens*. *PLANT Physiol.* 166, 903–919.
- 8 17. Johansen, W., Ako, A.E., Demko, V., Perroud, P.-F., Rensing, S.A., Mekhlif, A.K., and  
9 Olsen, O.-A. (2016). The DEK1 calpain Linker functions in three-dimensional body  
10 patterning in *Physcomitrella patens*. *Plant Physiol.* 172, pp.00925.2016.
- 11 18. Perroud, P., Meyberg, R., Demko, V., Quatrano, R.S., Olsen, O., and Rensing, S.A.  
12 (2020). DEK1 displays a strong subcellular polarity during *Physcomitrella patens* 3D  
13 growth. *New Phytol.* 226, 1029–1041.
- 14 19. Whitewoods, C.D., Cammarata, J., Nemeč, Z., Roeder, A.H.K., Scanlon, M.J., Jill, C.,  
15 Correspondence, H., Nemeč Venza, Z., Sang, S., Crook, A.D., *et al.* (2018).  
16 CLAVATA Was a Genetic Novelty for the Morphological Innovation of 3D Growth in  
17 Land Plants. *Curr. Biol.* 28, 2365-2376.e5.
- 18 20. Moody, L.A., Kelly, S., Rabbinowitsch, E., and Langdale, J.A. (2018). Genetic  
19 Regulation of the 2D to 3D Growth Transition in the Moss *Physcomitrella patens*.  
20 *Curr. Biol.* 28, 473-478.e5.
- 21 21. Moody, L.A. (2019). The 2D to 3D growth transition in the moss *Physcomitrella*  
22 *patens*. *Curr. Opin. Plant Biol.* 47, 88–95.
- 23 22. Perroud, P.-F., Cove, D.J., Quatrano, R.S., and McDaniel, S.F. (2011). An  
24 experimental method to facilitate the identification of hybrid sporophytes in the moss  
25 *Physcomitrella patens* using fluorescent tagged lines. *New Phytol.* 191, 301–306.
- 26 23. Moody, L.A., Kelly, S., Coudert, Y., Nimchuk, Z.L., Harrison, C.J., and Langdale, J.A.  
27 (2018). Somatic hybridization provides segregating populations for the identification of  
28 causative mutations in sterile mutants of the moss *Physcomitrella patens*. *New Phytol.*  
29 218, 1270–1277.
- 30 24. Yi, Y., and Jack, T. (1998). An intragenic suppressor of the arabidopsis floral organ  
31 identity mutant *apetala3-1* functions by suppressing defects in splicing. *Plant Cell* 10,  
32 1465–1477.
- 33 25. Hofmann, K., and Stoffel, W. (1993) TMbase – A database of membrane spanning  
34 proteins segments. *Biol. Chem. Hoppe-Seyler* 374, 166.
- 35 26. Levsh, O., Chiang, Y.C., Tung, C.F., Noel, J.P., Wang, Y., and Weng, J.K. (2016).  
36 Dynamic Conformational States Dictate Selectivity toward the Native Substrate in a  
37 Substrate-Permissive Acyltransferase. *Biochemistry* 55, 6314–6326.

- 1 27. Hoffmann, L., Besseau, S., Geoffroy, P., Ritzenthaler, C., Meyer, D., Lapierre, C.,  
2 Pollet, B., and Legrand, M. (2004). Silencing of hydroxycinnamoyl-coenzyme A  
3 shikimate/quinate hydroxycinnamoyltransferase affects phenylpropanoid biosynthesis.  
4 *Plant Cell* 16, 1446–1465.
- 5 28. Renault, H., Alber, A., Horst, N.A., Basilio Lopes, A., Fich, E.A., Kriegshausen, L.,  
6 Wiedemann, G., Ullmann, P., Herrgott, L., Erhardt, M., *et al.* (2017). A phenol-  
7 enriched cuticle is ancestral to lignin evolution in land plants. *Nat. Commun.* 8, 1–8.
- 8 29. Besseau, S., Hoffmann, L., Geoffroy, P., Lapierre, C., Pollet, B., and Legrand, M.  
9 (2007). Flavonoid accumulation in *Arabidopsis* repressed in lignin synthesis affects  
10 auxin transport and plant growth. *Plant Cell* 19, 148–162.
- 11 30. Bennett, T.A., Liu, M.M., Aoyama, T., Bierfreund, N.M., Braun, M., Coudert, Y.,  
12 Dennis, R.J., O'Connor, D., Wang, X.Y., White, C.D., *et al.* (2014). Plasma  
13 membrane-targeted PIN proteins drive shoot development in a moss. *Curr. Biol.* 24,  
14 2776–2785.
- 15 31. Koduri, P.K.H., Gordon, G.S., Barker, E.I., Colpitts, C.C., Ashton, N.W., and Suh, D.Y.  
16 (2010). Genome-wide analysis of the chalcone synthase superfamily genes of  
17 *Physcomitrella patens*. *Plant Mol. Biol.* 72, 247–263.
- 18 32. Wolf, L., Rizzini, L., Stracke, R., Ulm, R., and Rensing, S.A. (2010). The molecular  
19 and physiological responses of *Physcomitrella patens* to Ultraviolet-B Radiation. *Plant*  
20 *Physiol.* 153, 1123–1134.
- 21 33. Hiss, M., Meyberg, R., Westermann, J., Haas, F.B., Schneider, L., Schallenberg-  
22 Rüdinger, M., Ullrich, K.K., and Rensing, S.A. (2017). Sexual reproduction,  
23 sporophyte development and molecular variation in the model moss *Physcomitrella*  
24 *patens*: introducing the ecotype Reute. *Plant J.* 90, 606–620.
- 25 34. Alber, A. V., Renault, H., Basilio-Lopes, A., Bassard, J., Liu, Z., Ullmann, P., Lesot, A.,  
26 Bihel, F., Schmitt, M., Werck-Reichhart, D., *et al.* (2019). Evolution of coumaroyl  
27 conjugate 3-hydroxylases in land plants: lignin biosynthesis and defense. *Plant J.* 99,  
28 tpj.14373.
- 29 35. Viaene, T., Landberg, K., Thelander, M., Medvecká, E., Pederson, E., Feraru, E.,  
30 Cooper, E.D., Karimi, M., Delwiche, C.F., Ljung, K., *et al.* (2014). Directional auxin  
31 transport mechanisms in early diverging land plants. *Curr. Biol.* 24, 2786–2791.
- 32 36. Frank, M.H., and Scanlon, M.J. (2015). Cell-specific transcriptomic analyses of three-  
33 dimensional shoot development in the moss *Physcomitrella patens*. *Plant J.* 83, 743–  
34 751.
- 35 37. Moubayidin, L., DiMambro, R., Sozzani, R., Pacifici, E., Salvi, E., Terpstra, I., Bao, D.,  
36 vanDijken, A., Dellololo, R., Perilli, S., *et al.* (2013). Spatial coordination between  
37 stem cell activity and cell differentiation in the root meristem. *Dev. Cell* 26, 405–415.

- 1 38. Moubayidin, L., Salvi, E., Giustini, L., Terpstra, I., Heidstra, R., Costantino, P., and  
2 Sabatini, S. (2016). A SCARECROW-based regulatory circuit controls Arabidopsis  
3 thaliana meristem size from the root endodermis. *Planta* 243, 1159–1168.
- 4 39. Hiwatashi, Y., Nishiyama, T., Fujita, T., and Hasebe, M. (2001). Establishment of  
5 gene-trap and enhancer-trap systems in the moss *Physcomitrella patens*. *Plant J.* 28,  
6 105–116.
- 7 40. Cove, D.J., Perroud, P.F., Charron, A.J., McDaniel, S.F., Khandelwal, A., and  
8 Quatrano, R.S. (2009). Somatic hybridization in the moss *Physcomitrella patens* using  
9 PEG-induced protoplast fusion. *Cold Spring Harb. Protoc.* 4.
- 10 41. Yasumura, Y., Moylan, E.C., and Langdale, J.A. (2005). A conserved transcription  
11 factor mediates nuclear control of organelle biogenesis in anciently diverged land  
12 plants. *Plant Cell* 17, 1894–1907.
- 13 42. Bolger, A.M., Lohse, M., and Usadel, B. (2014). Trimmomatic: A flexible trimmer for  
14 Illumina sequence data. *Bioinformatics* 30, 2114–2120.
- 15 43. Li, H. (2013). Aligning sequence reads, clone sequences and assembly contigs with  
16 BWA-MEM ([arXiv:1303.3997](https://arxiv.org/abs/1303.3997)).
- 17 44. McKenna, A., Hanna, M., Banks, E., Sivachenko, A., Cibulskis, K., Kernytsky, A.,  
18 Garimella, K., Altshuler, D., Gabriel, S., Daly, M., *et al.* (2010). The genome analysis  
19 toolkit: A MapReduce framework for analyzing next-generation DNA sequencing data.  
20 *Genome Res.* 20, 1297–1303.
- 21 45. Emms, D.M., and Kelly, S. (2015). OrthoFinder: solving fundamental biases in whole  
22 genome comparisons dramatically improves orthogroup inference accuracy. *Genome*  
23 *Biol.* 16, 157.
- 24 46. Emms, D.M., and Kelly, S. (2019). OrthoFinder: Phylogenetic orthology inference for  
25 comparative genomics. *Genome Biol.* 20, 238.
- 26 47. Kumar, S., Stecher, G., Li, M., Knyaz, C., and Tamura, K. (2018) MEGA X: Molecular  
27 Evolutionary Genetics Analysis across Computing Platforms. *Mol. Biol. Evol.* 35,  
28 1547-1549.
- 29 48. Trifinopoulos, J., Nguyen, L.-T., von Haeseler, A., and Quang Minh, B. (2016). W-IQ-  
30 TREE: a fast online phylogenetic tool for maximum likelihood analysis. *Nucleic Acids*  
31 *Res.* 44, W232–W235.
- 32 49. Letunic, I., and Bork, P. (2019). Interactive Tree Of Life (iTOL) v4: recent updates and  
33 new developments. *Web Serv. issue Publ. online* 47, W256–W259.
- 34 50. Livak, K.J., and Schmittgen, T.D. (2001). Analysis of Relative Gene Expression Data  
35 Using Real-Time Quantitative PCR and the 2 C T Method. *METHODS* 25, 402–408.

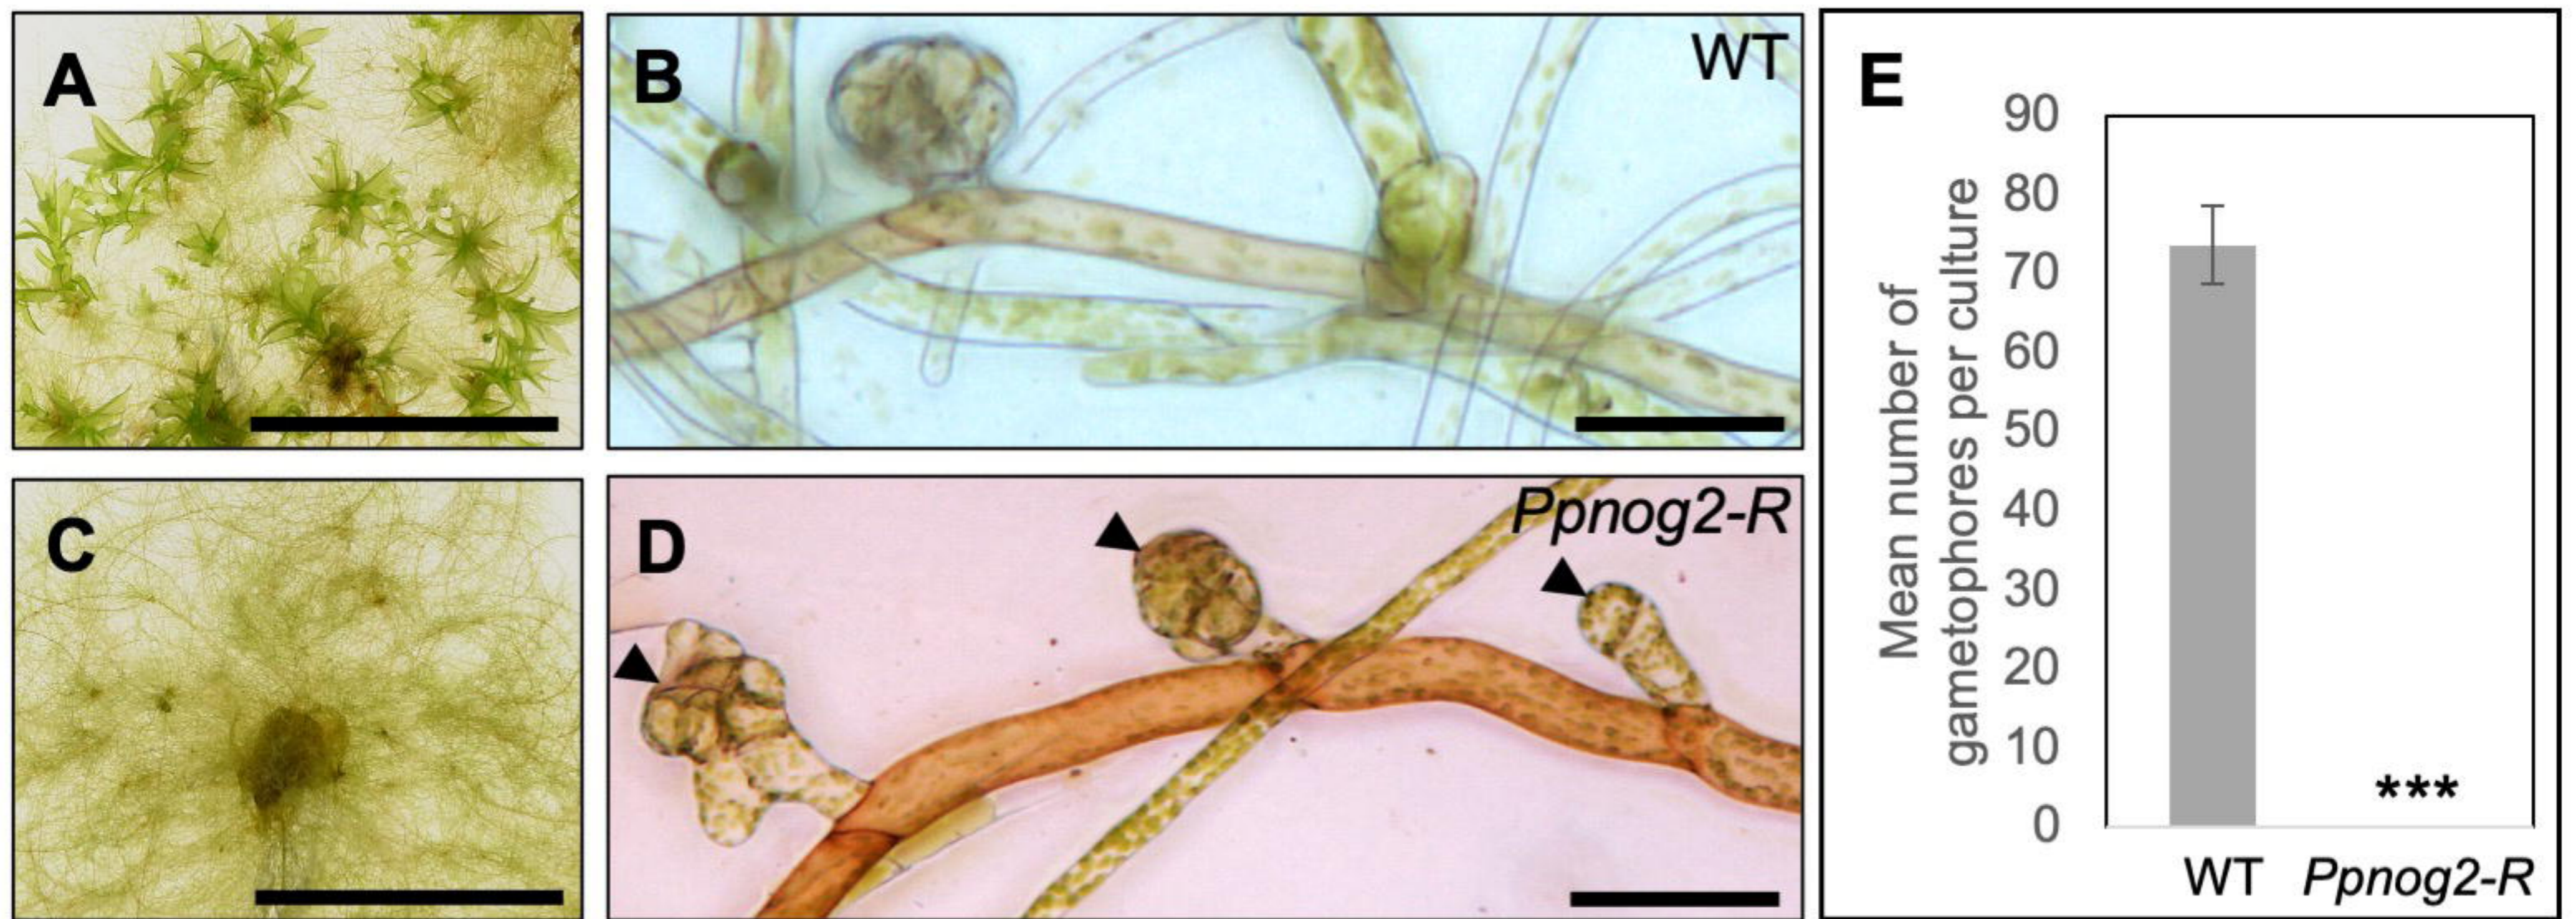

**Figure 1. *Ppnog2-R* mutants produce supernumerary buds**

(A-D) 1 month old Vx::mCherry (WT) (A and B) and *Ppnog2-R* (C and D) plants showing the presence (WT, A) and absence (*Ppnog2-R*, C) of gametophores and the protonemal filaments (B and D) with supernumerary buds visible in *Ppnog2-R* (D). (E) Mean number of gametophores per culture ( $n = 10$ )  $\pm$  SEM (WT =  $73.7 \pm 4.90$ ; *Ppnog2-R* =  $0 \pm 0$ ; t test  $p < 0.05$  \*\*\*). Scale bars, 1 cm (A and C) and 50  $\mu$ m (B and D).



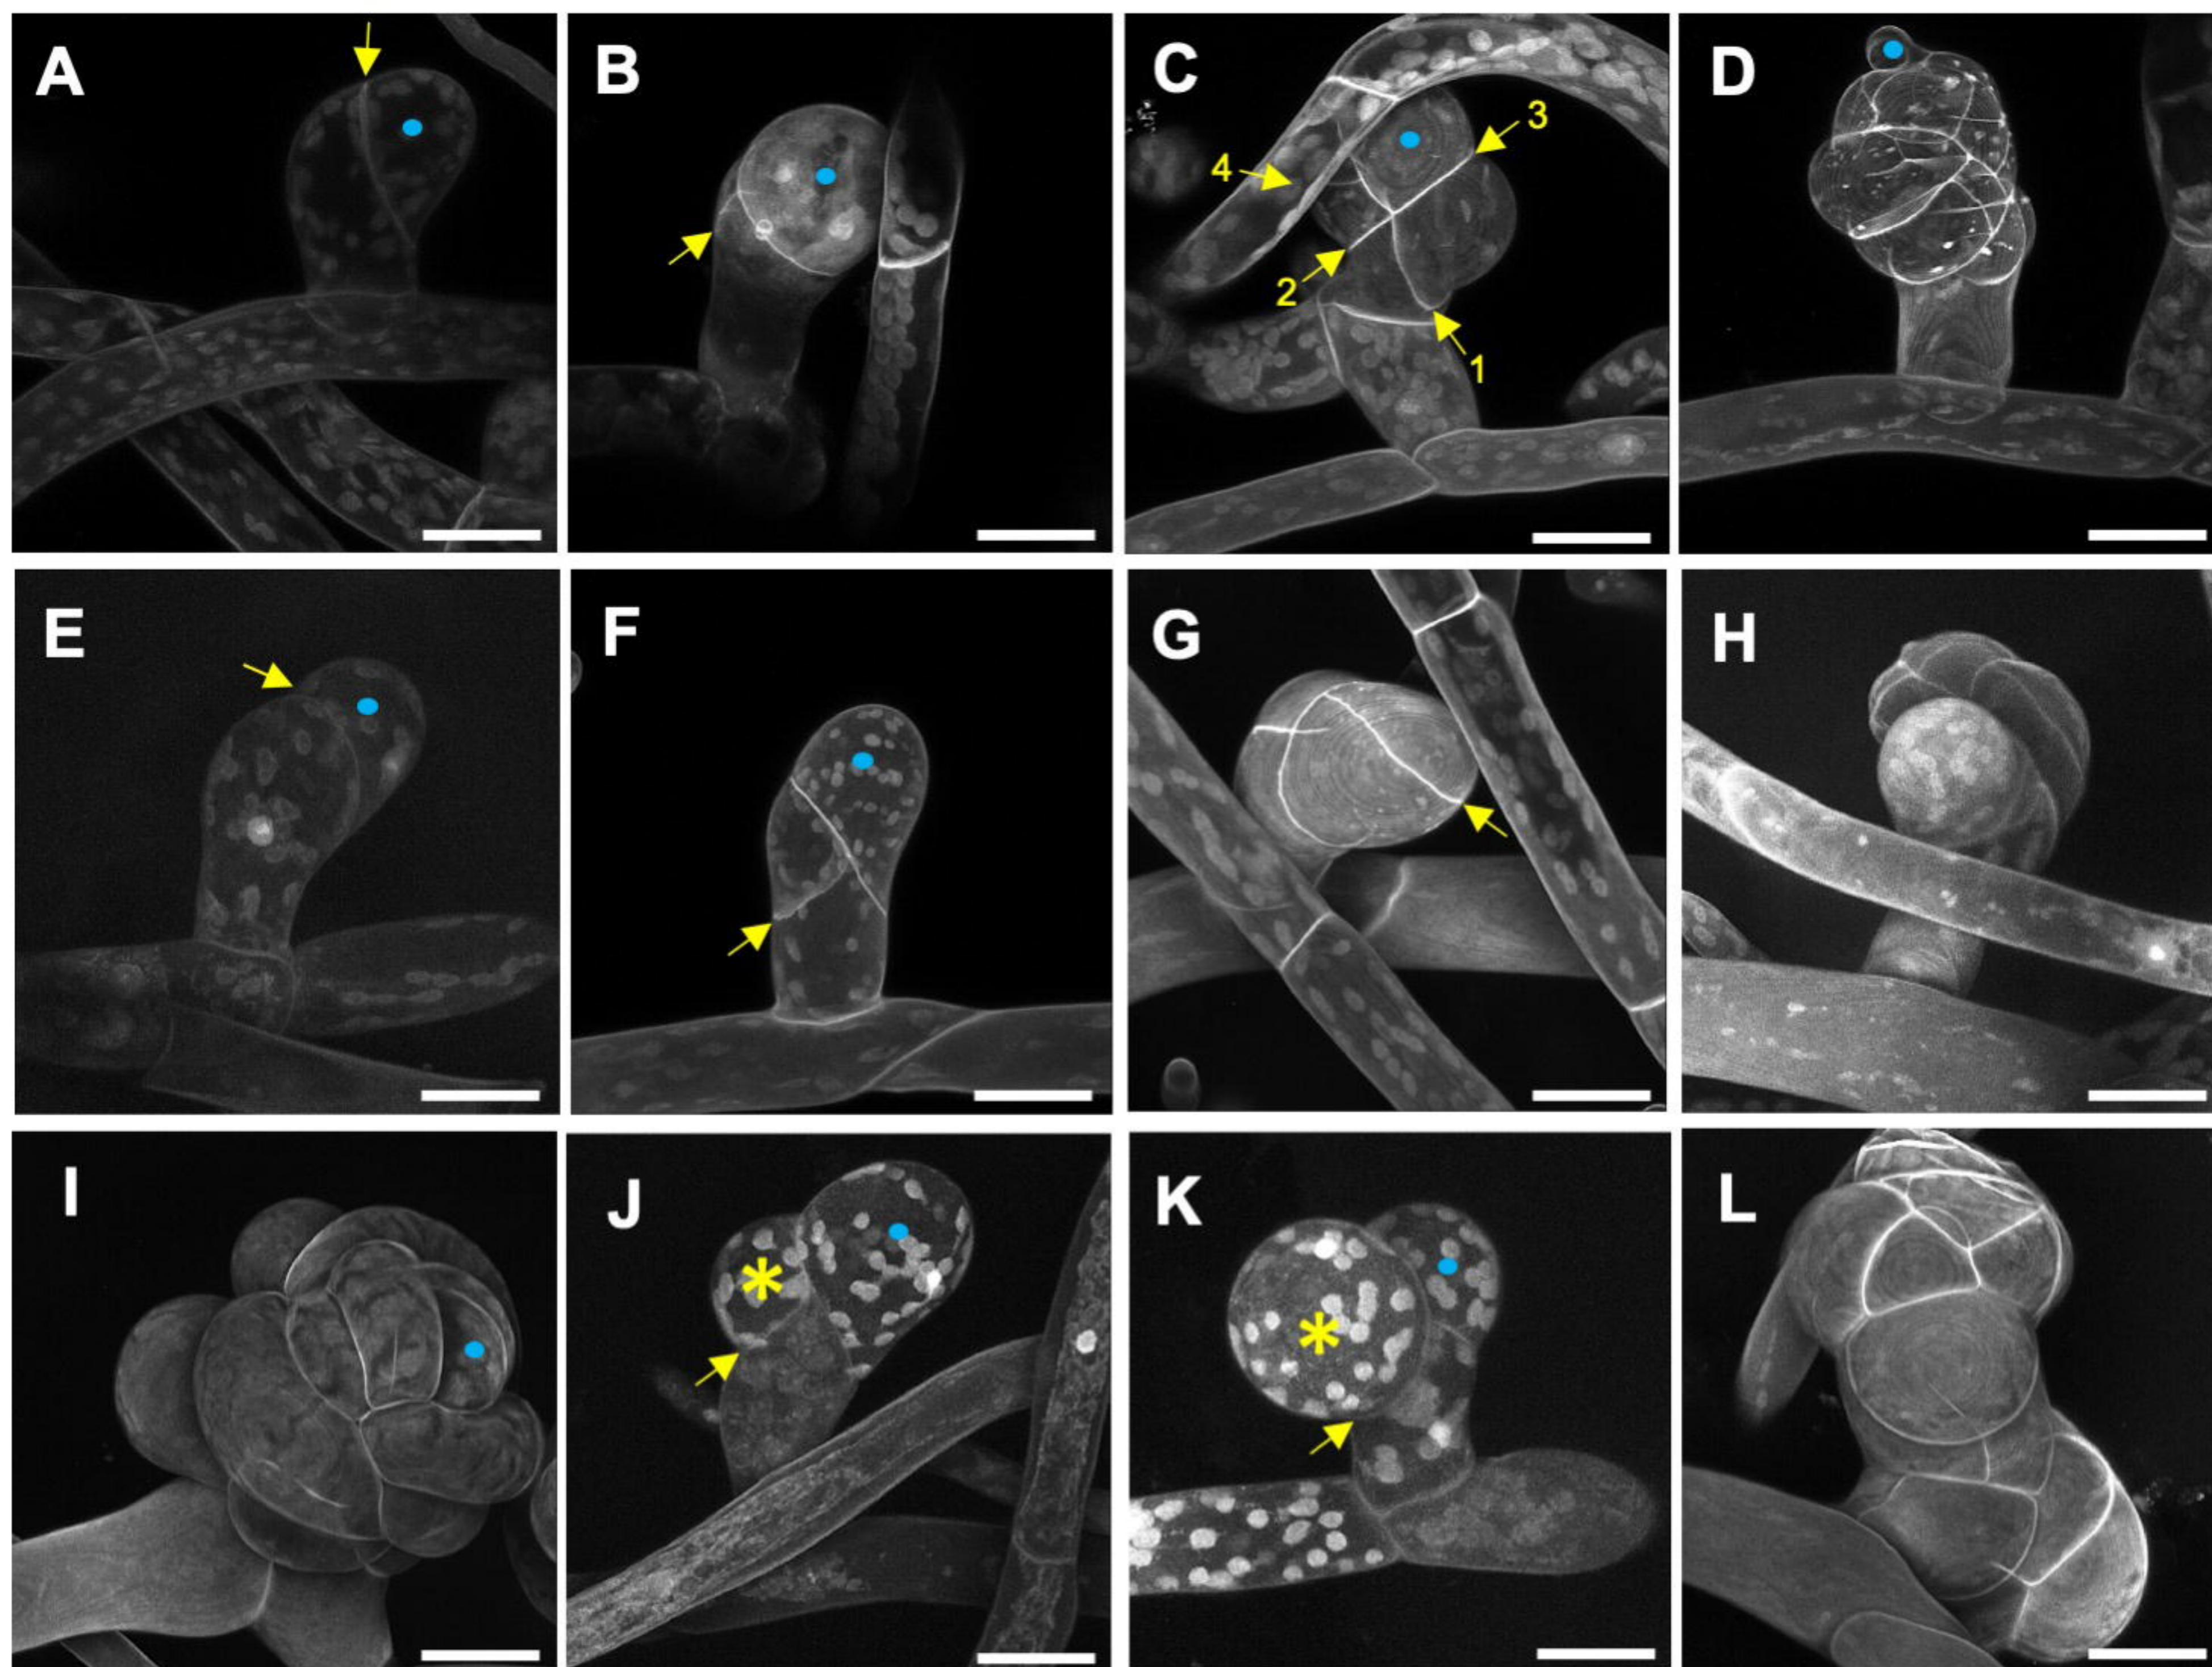

bioRxiv preprint doi: <https://doi.org/10.1101/2020.07.21.213728>; this version posted July 22, 2020. The copyright holder for this preprint (which was not certified by peer review) is the author/funder, who has granted bioRxiv a license to display the preprint in perpetuity. It is made available under aCC-BY 4.0 International license.

## Figure 2. *Ppnog2-R* mutants fail to specify 3D growth

(A-L) Propidium iodide stained Vx::mCherry (WT) (A-D) and *Ppnog2-R* (E-L) buds at 2 (A and E), 3 (B, F, J and K), 4/5 (C and G) and 5+ (D, H, I and L) cell stages. Scale bars = 25  $\mu$ m; • = gametophore initial. Yellow arrows indicate the most recent division in each bud. Yellow asterisks (\*) denote cell in *Ppnog2-R* (J and K) that undergoes abnormal swelling.

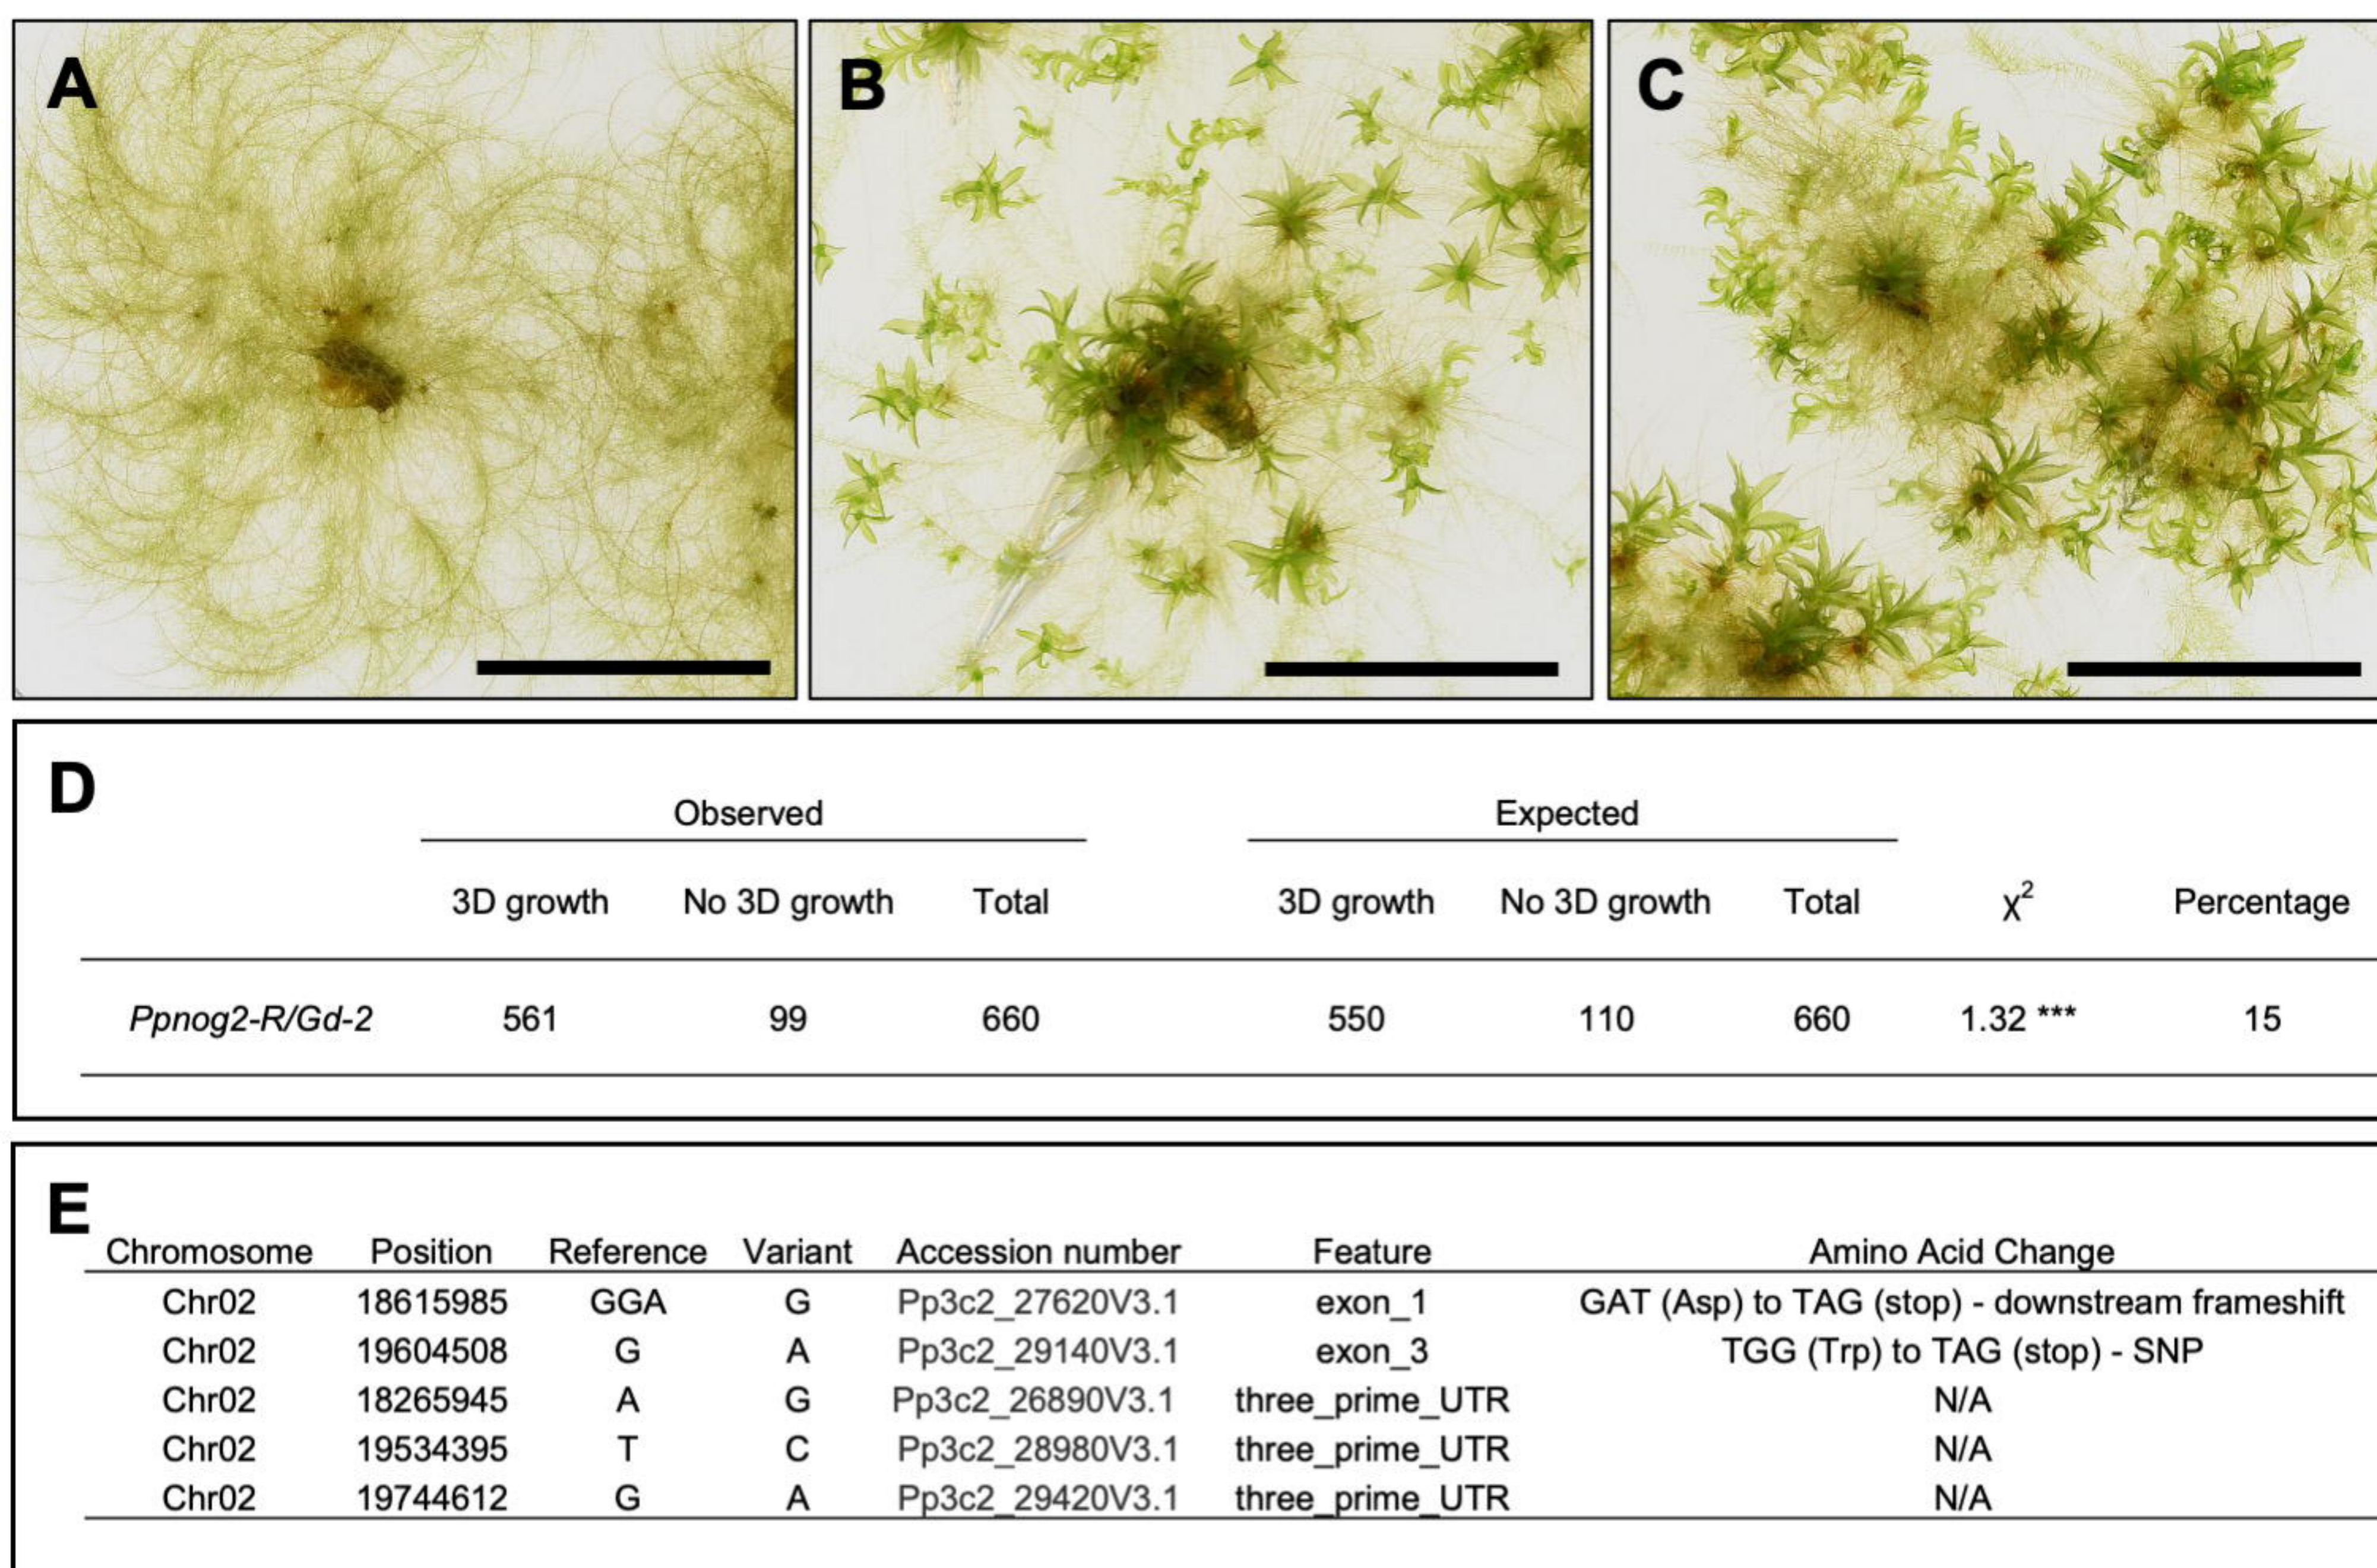

### Figure 3. Identification of the *PpNOG2* locus by somatic hybridization combined with bulk segregant analysis

(A-C) Representative images of 1-month old *Ppnog2-R* plant without gametophores (A), *Vx::mCherry* plant with gametophores (B) and *Ppnog2-R/Gd::GFP* hybrid with gametophores (C). Scale bars = 1 cm. (D) Phenotypic analysis of spore progeny derived from a single *Ppnog2-R/Gd::GFP* hybrid line (no. 2). Numbers are consistent with meiosis from a tetraploid sporophyte. Chi-square  $P < 0.05$  \*\*\*. (E) Candidate genes on Chromosome 2 within the genetic interval containing the *PpNOG2* genetic locus. See also **Figure S1**.

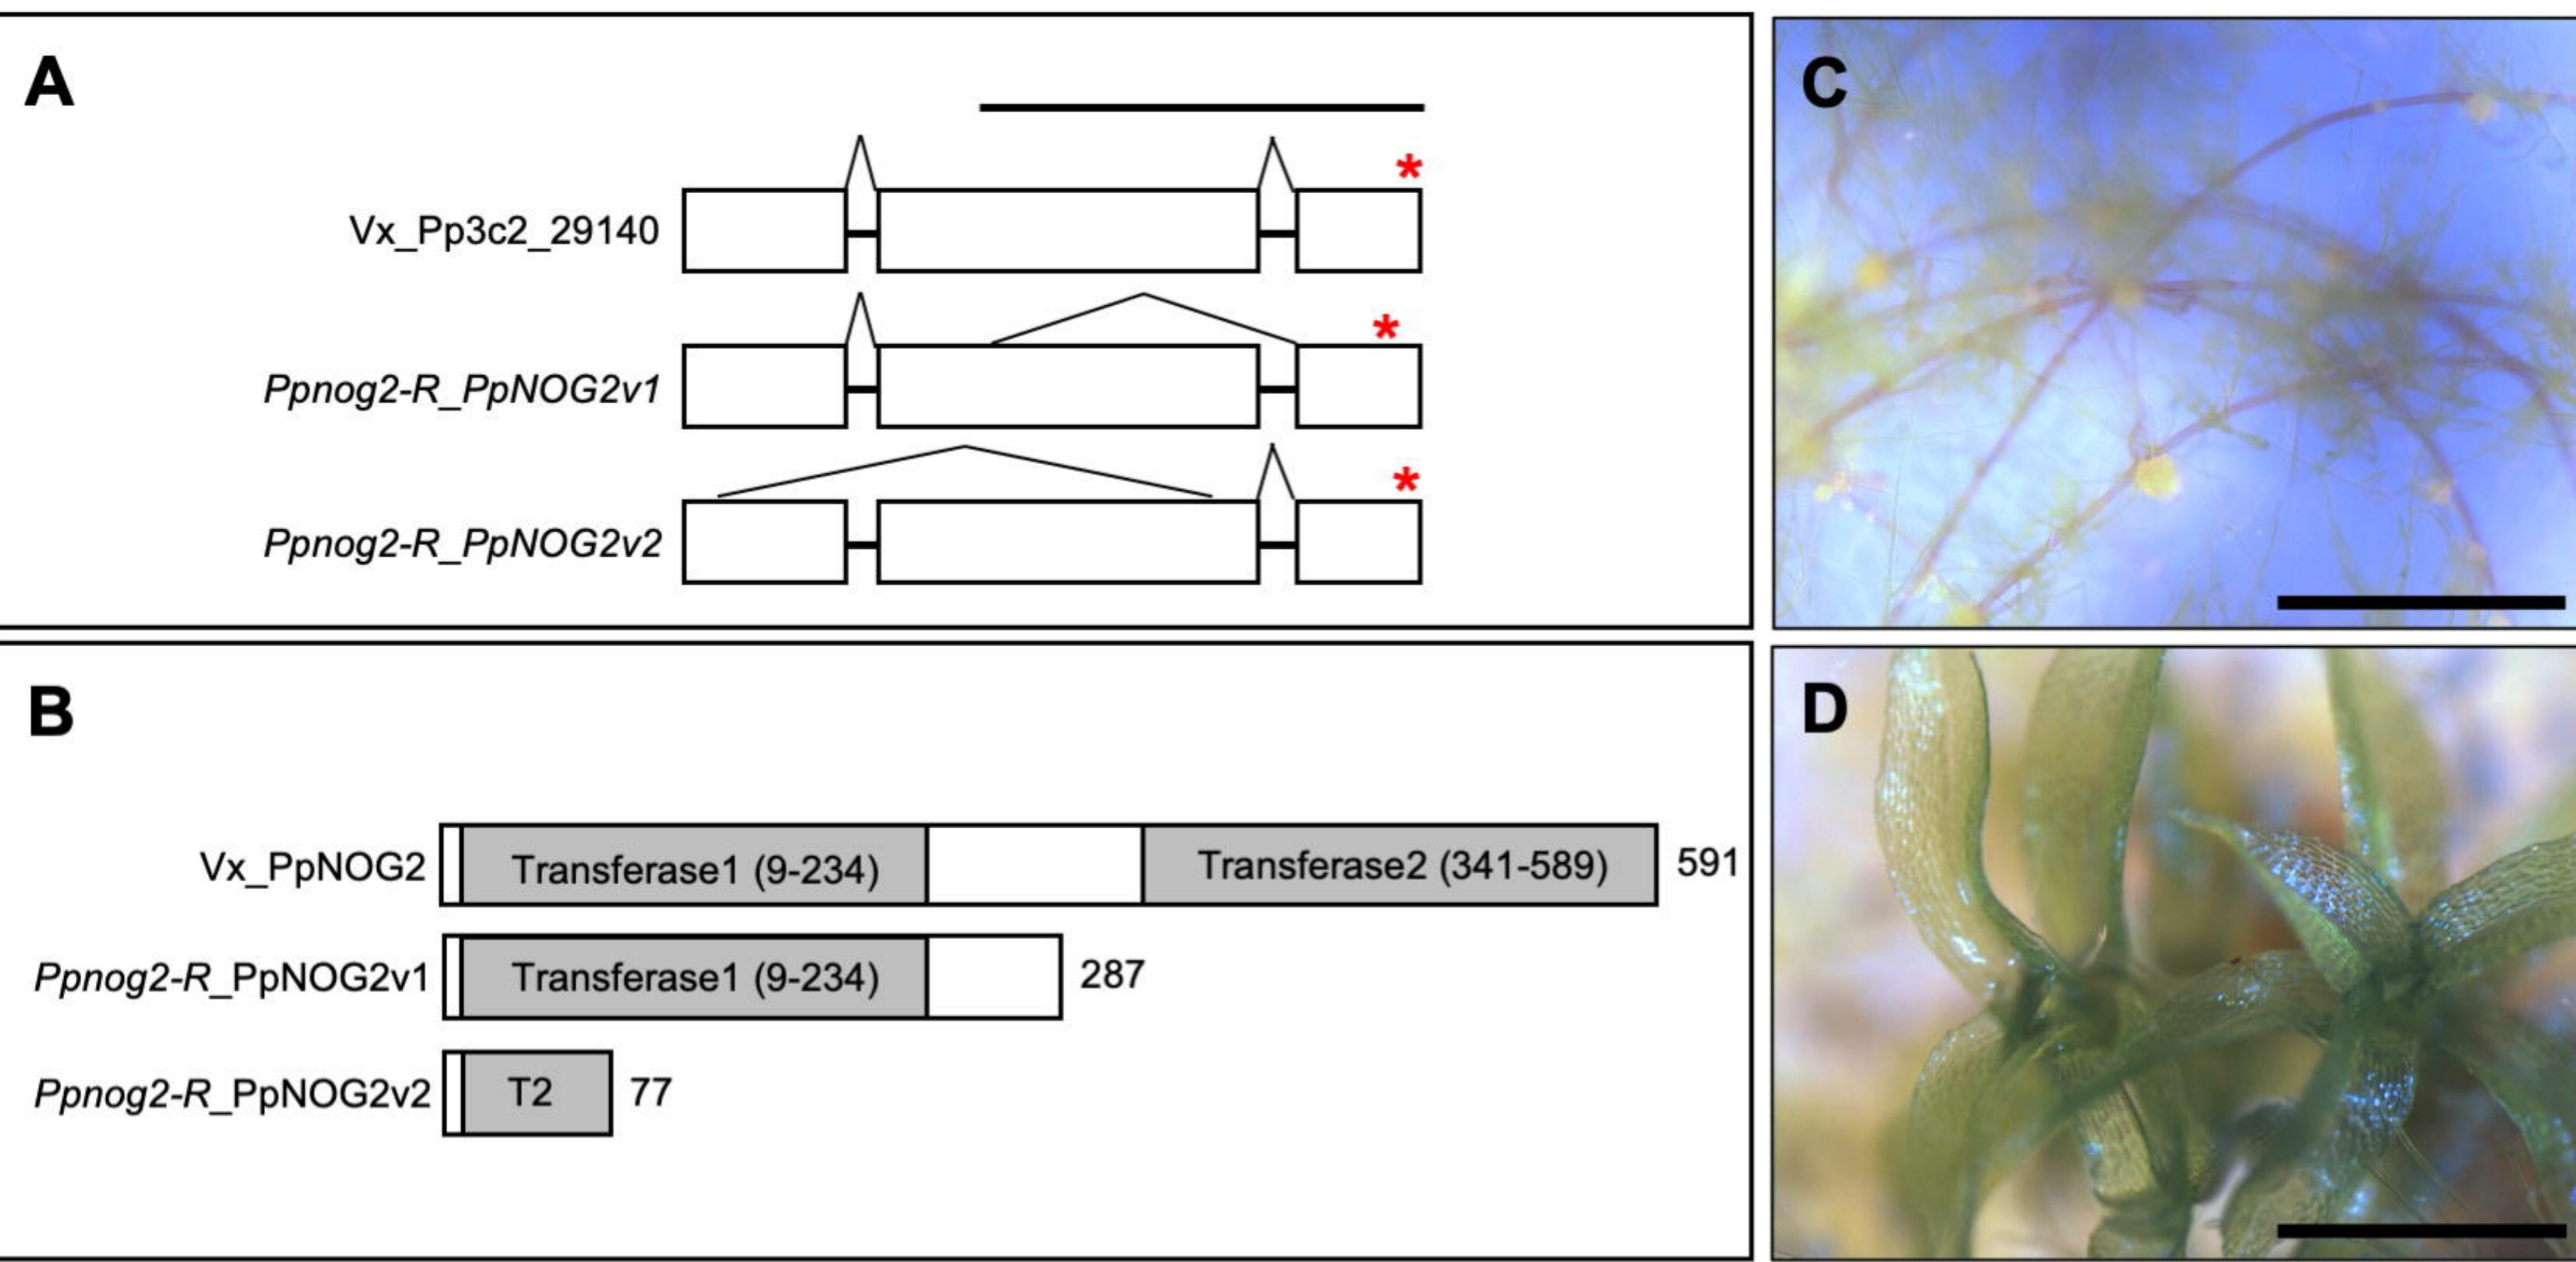

**Figure 4. The *PpNOG2* gene encodes a SHIKIMATE O-HYDROXYCINNAMOYLTRANSFERASE**

(A) *PpNOG2* transcripts in Vx::mCherry (Vx\_Pp3c2\_29140) and *Ppnog2-R* (v1 and v2). Exons (blocks) are separated by introns (lines); splicing patterns and in-frame stop codons (\*) are indicated. Scale = 1kb. (B) PpNOG2 protein in Vx::mCherry (Vx\_PpNOG2) and both variants of PpNOG2 protein in the *Ppnog2-R* mutant. *Ppnog2-R\_PpNOG2v1* contains an intact Transferase 1 (T1) domain but Transferase 2 (T2) is absent. In *Ppnog2-R\_PpNOG2v2*, T1 is absent and T2 is heavily truncated. The number of amino acid residues is indicated to the right of each image. (C, D) Representative images of 1-month old *Ppnog2-R* (C) and *Ppnog2-R* complemented with pAct::*PpNOG2*-mGFP (D). Scale bars = 1 mm. See also **Figure S2-S4** and **Data S2**.

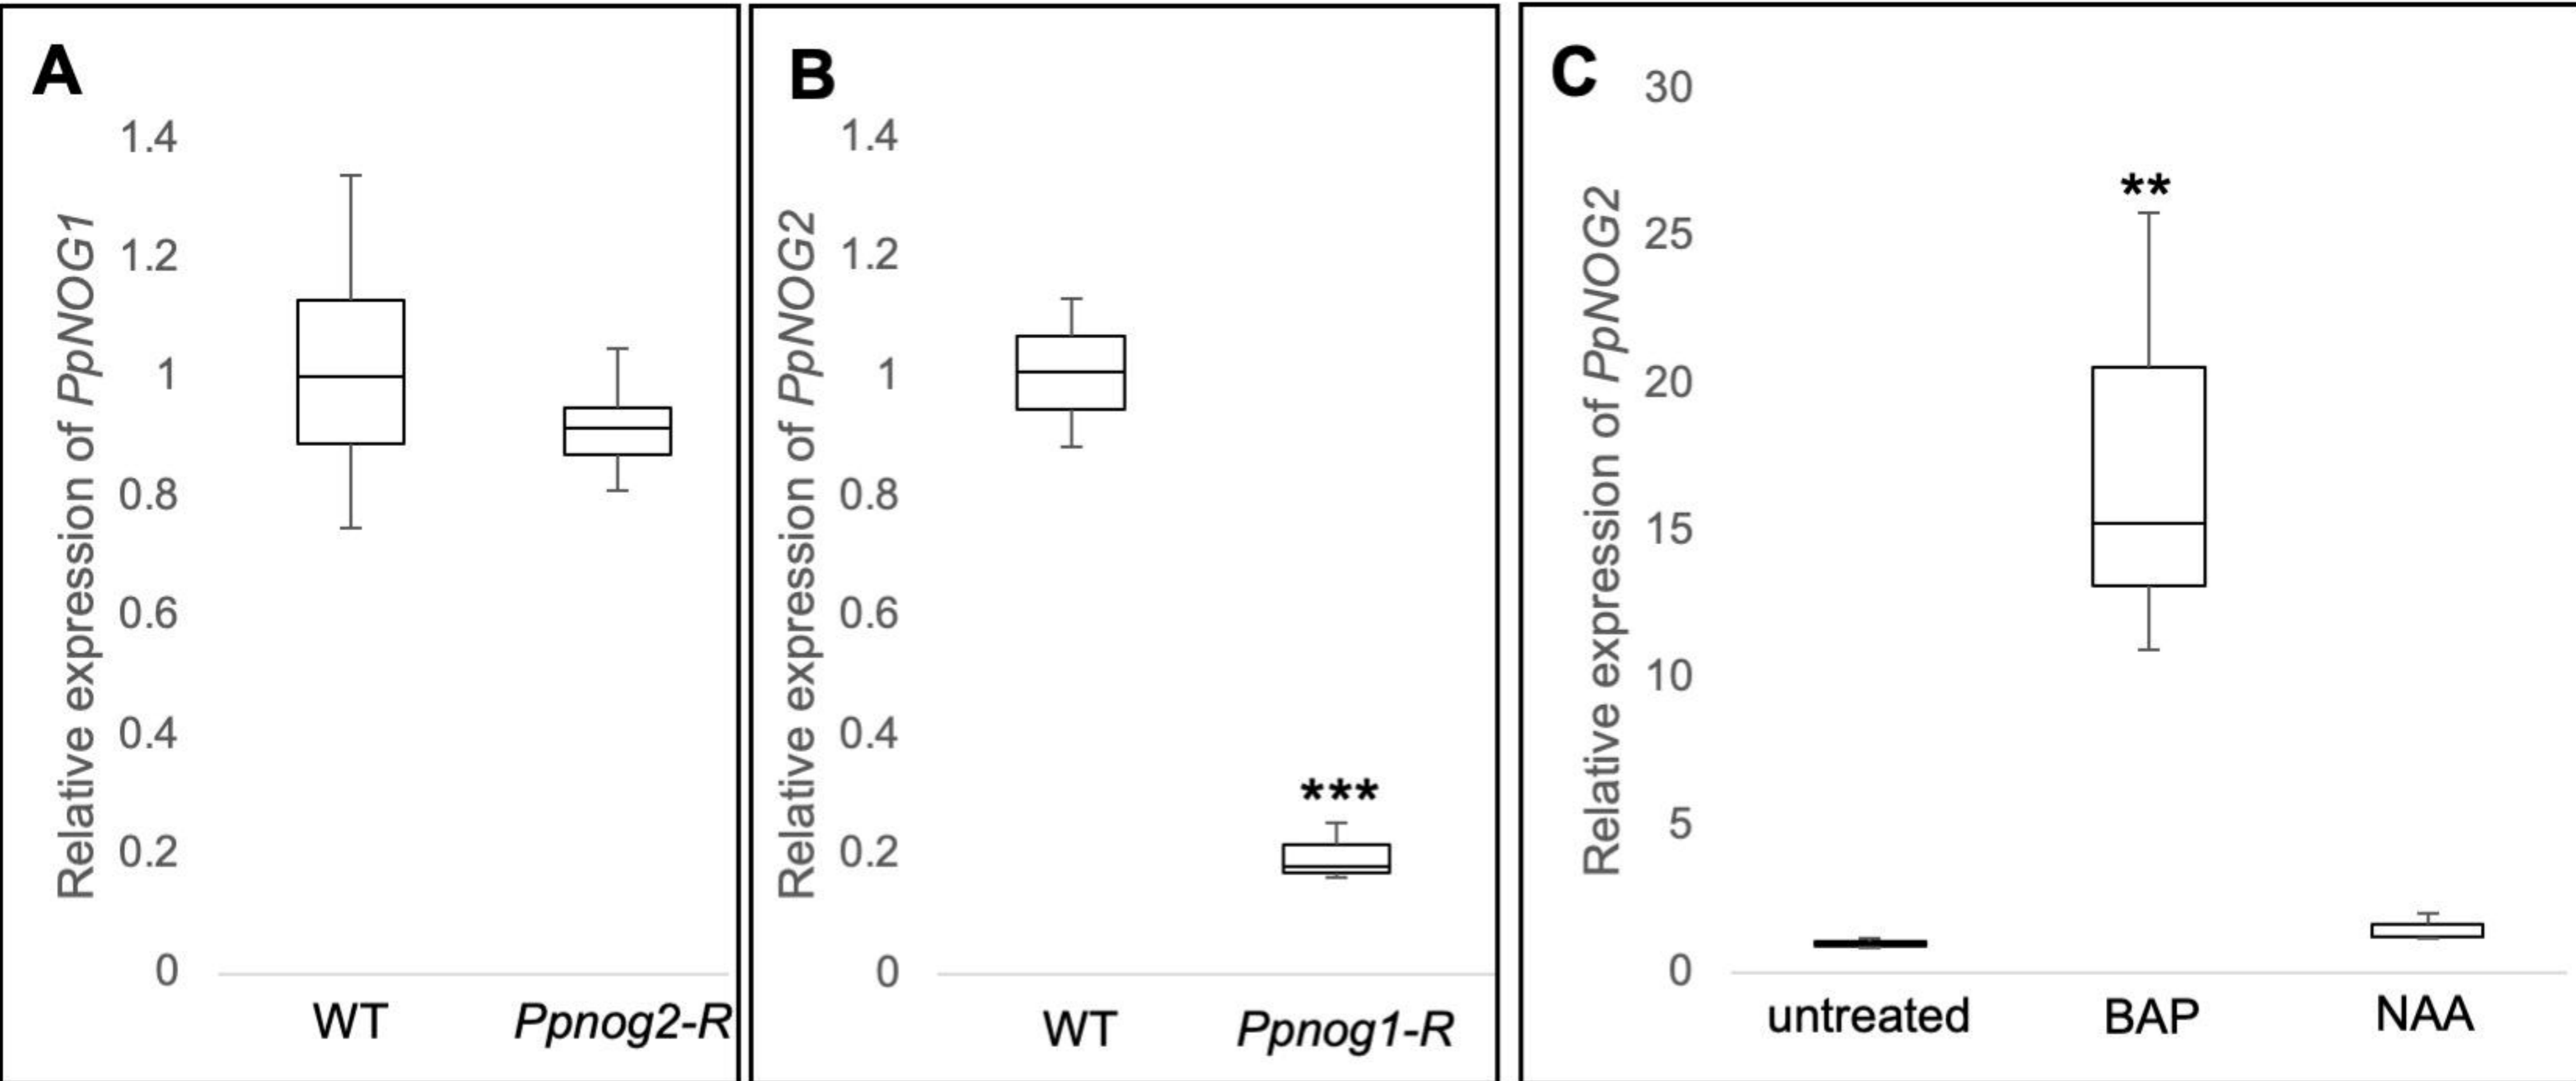

**Figure 5. *PpNOG2* acts downstream of *PpNOG1* and is regulated by cytokinin**  
 (A-C) Relative transcript levels in 12 d old protonemata: *PpNOG1* in WT and *Ppnog2-R* (A), *PpNOG2* in WT and *Ppnog1-R* (B), *PpNOG2* in wild-type  $\pm$  BAP or NAA (C). ANOVA, \*\*,  $p < 0.01$ ; \*\*\*,  $p < 0.001$ . See also **Figure S5**.

**A**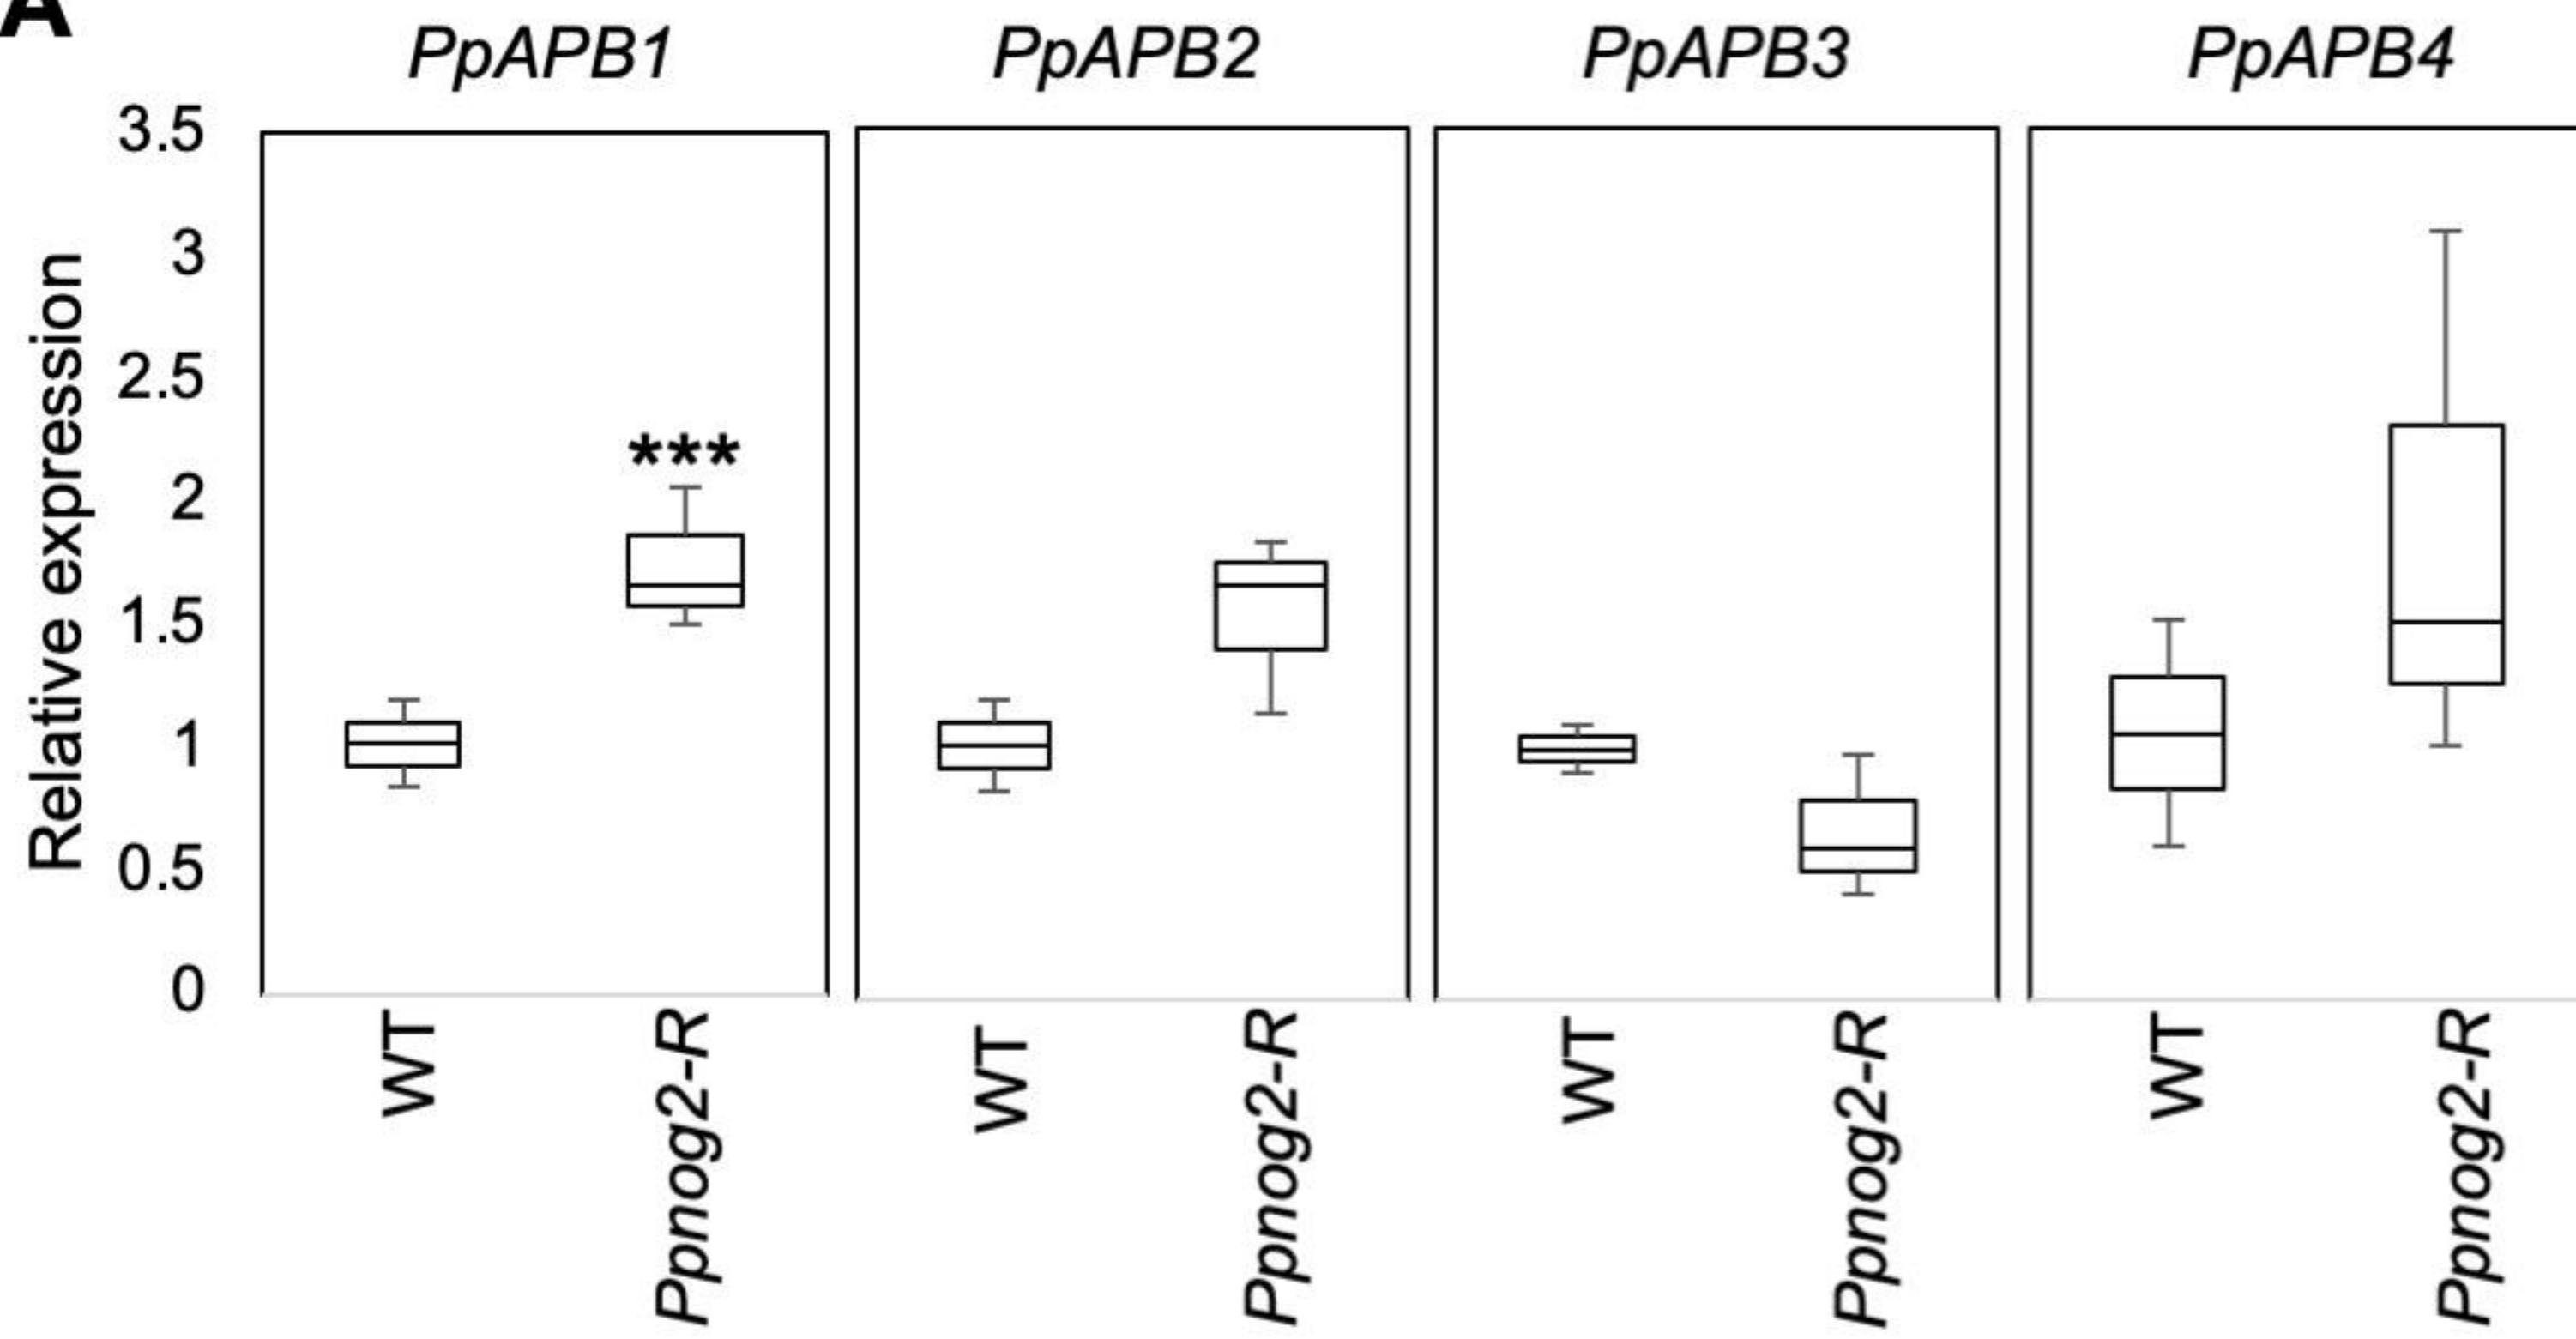**C**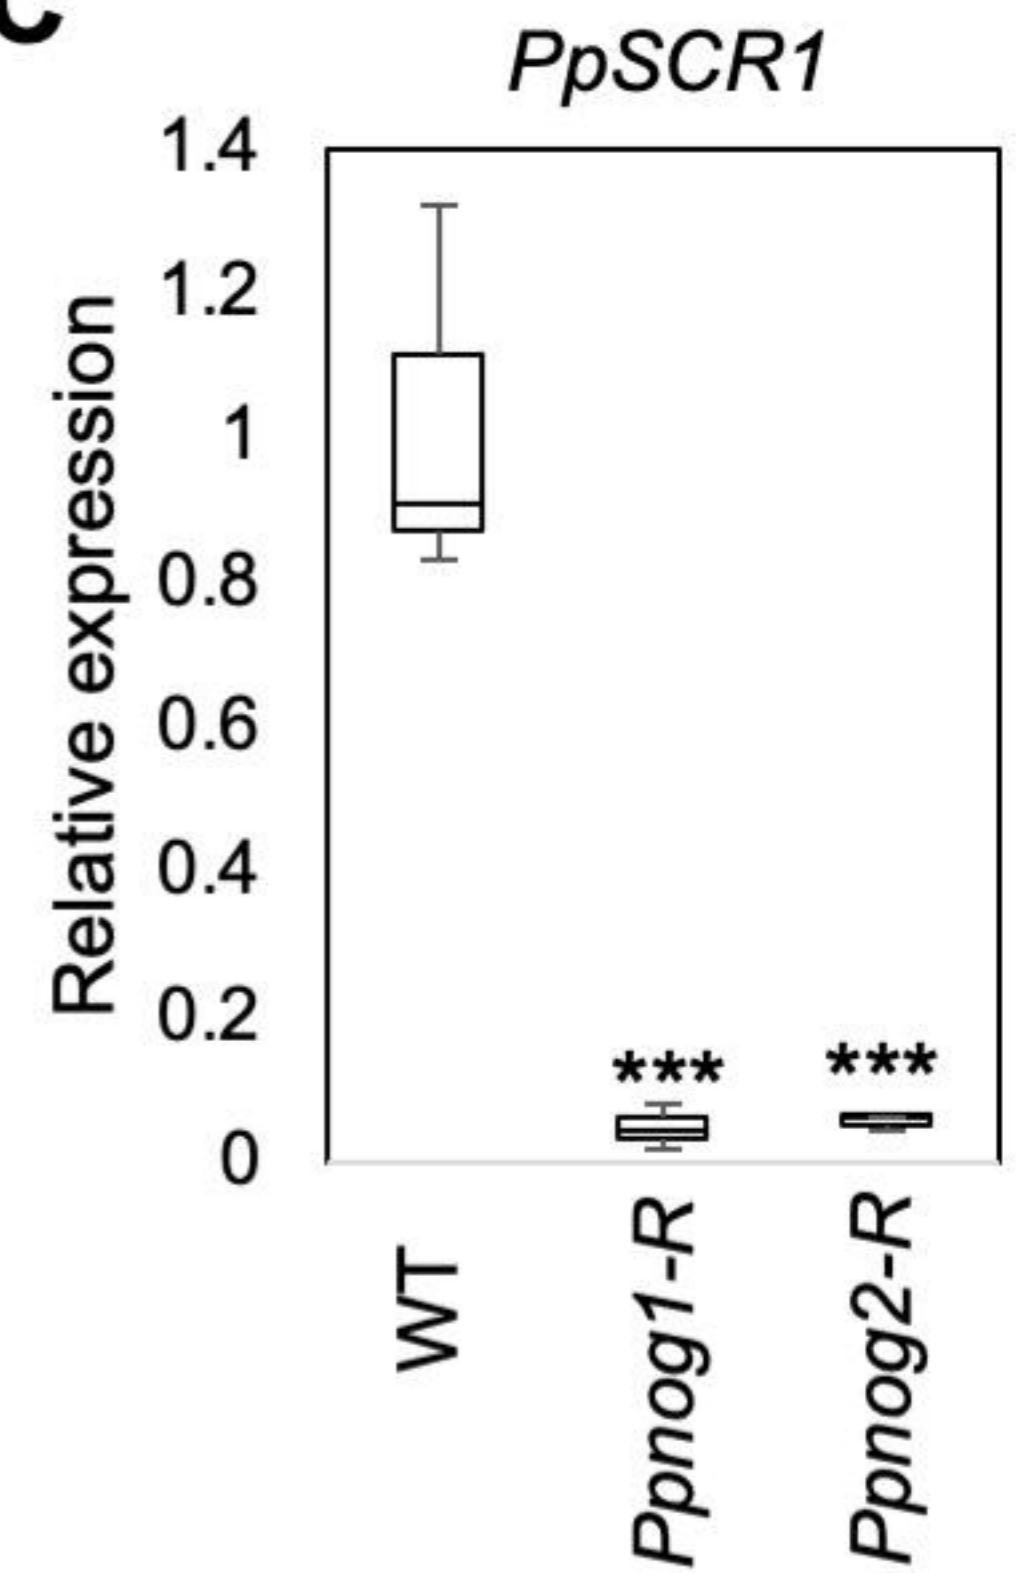**B**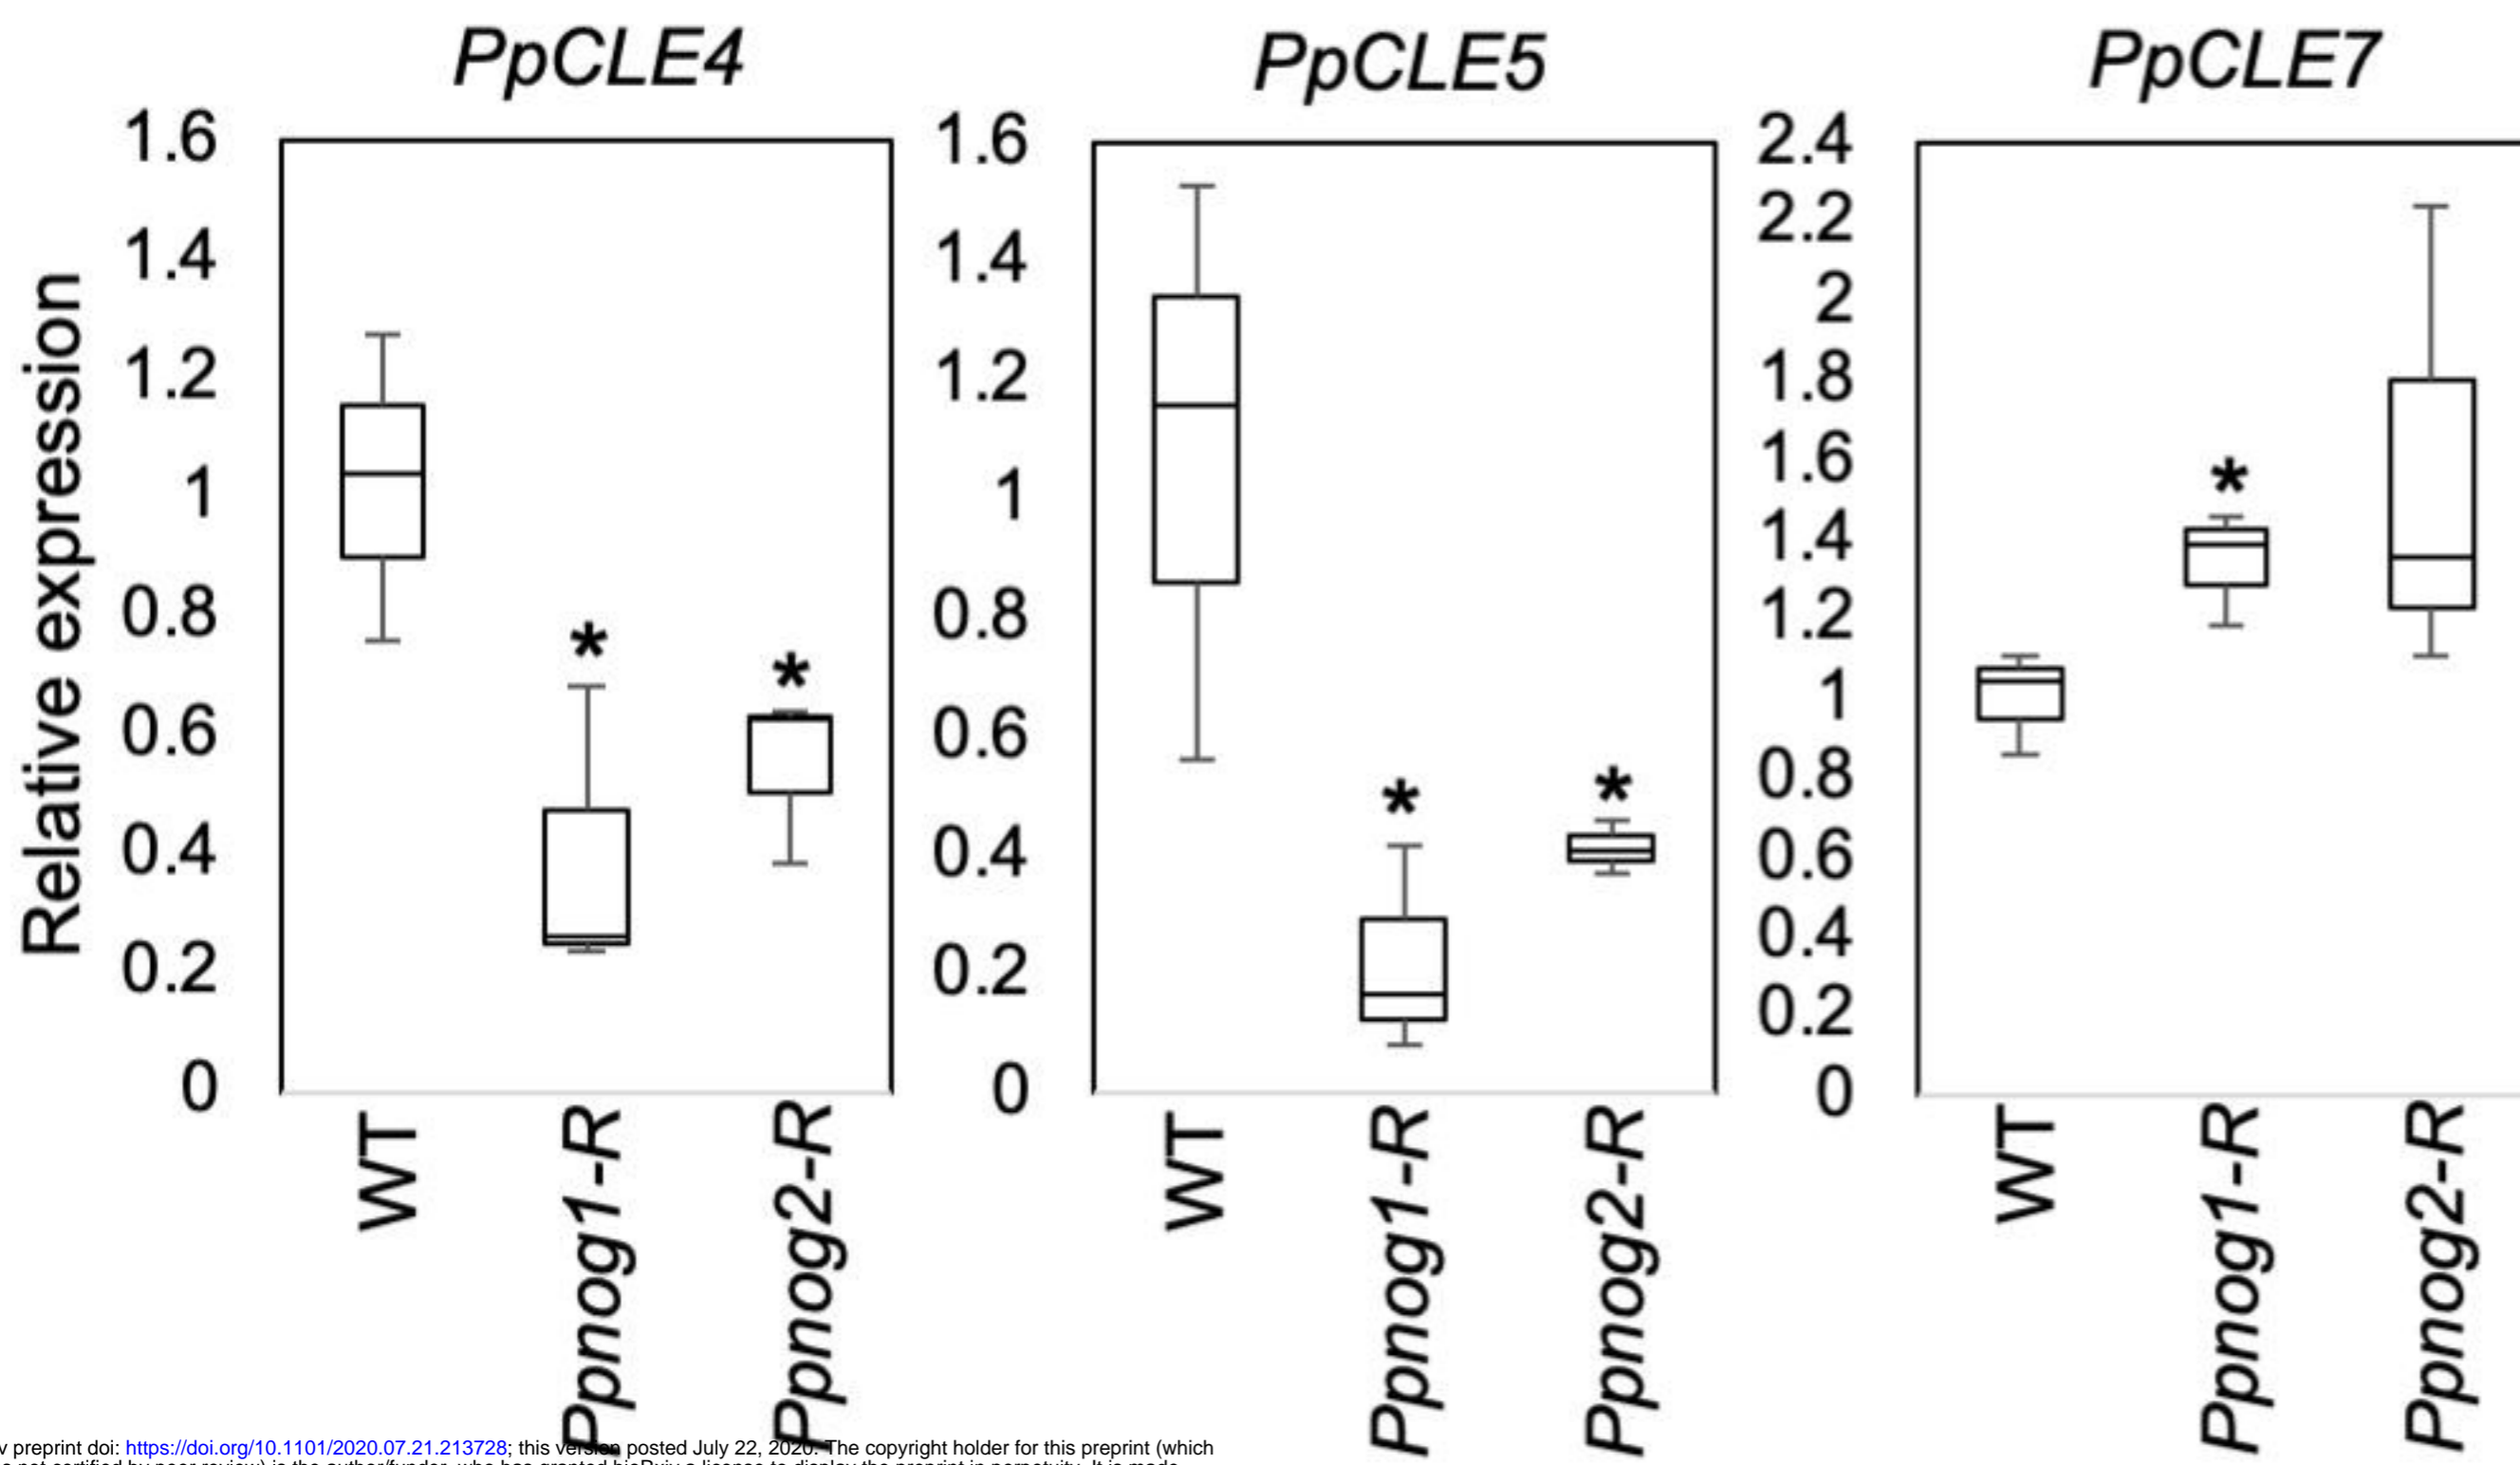**D**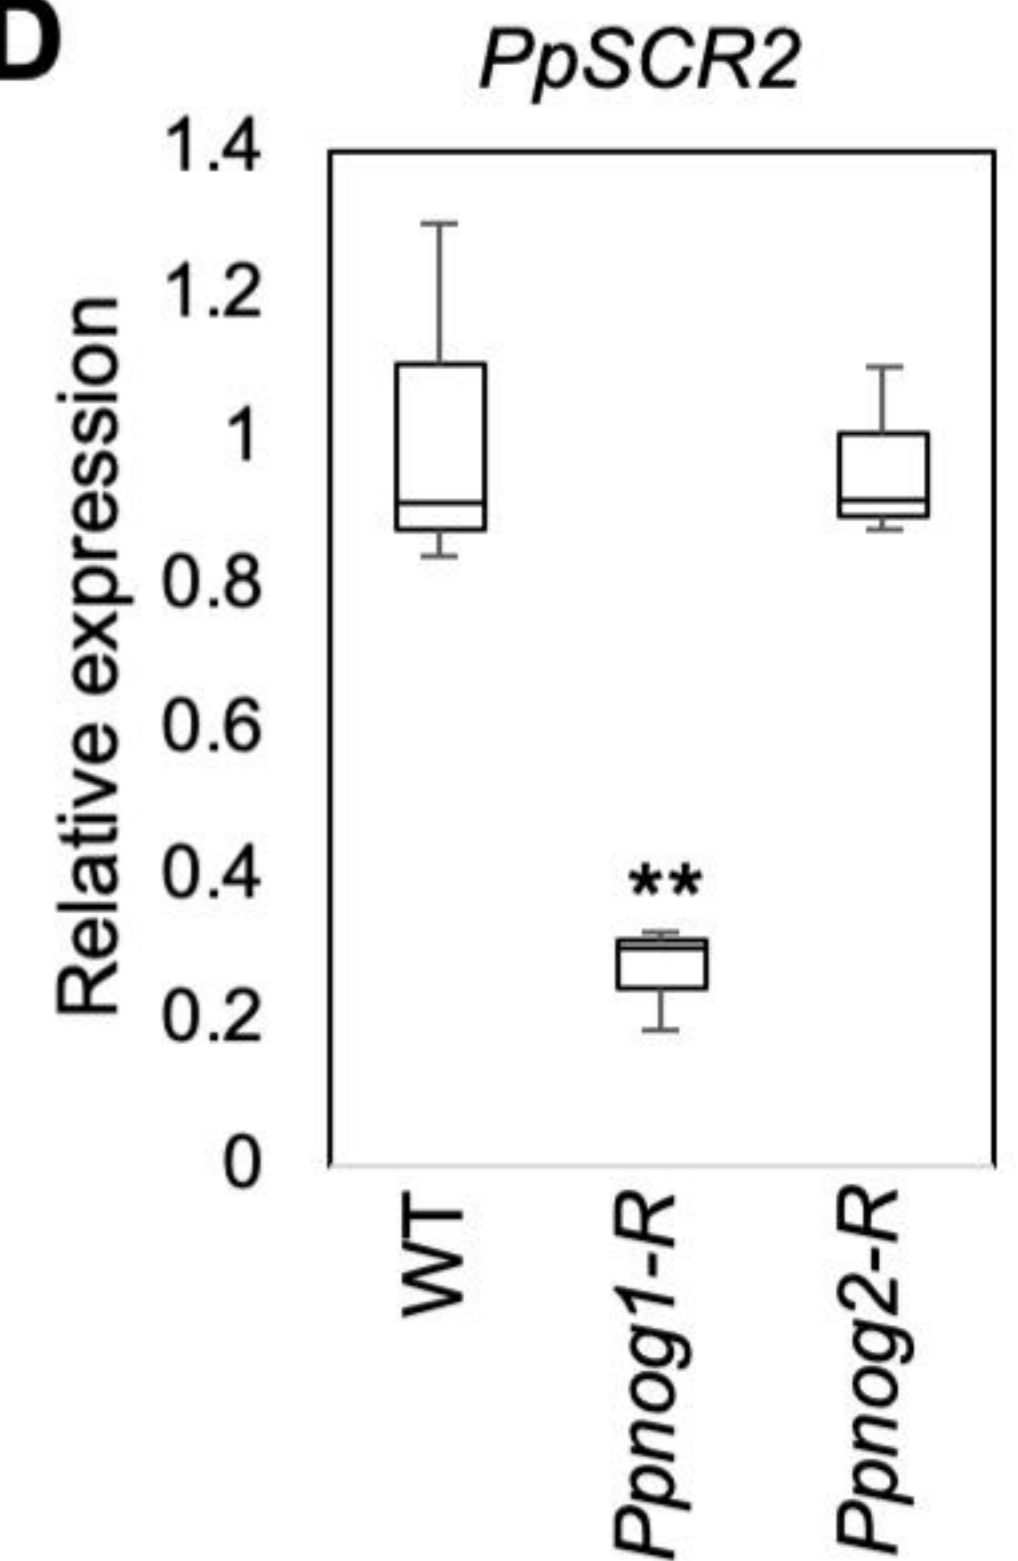

bioRxiv preprint doi: <https://doi.org/10.1101/2020.07.21.213728>; this version posted July 22, 2020. The copyright holder for this preprint (which was not certified by peer review) is the author/funder, who has granted bioRxiv a license to display the preprint in perpetuity. It is made available under aCC-BY 4.0 International license.

### Figure 6. PpNOG2 act upstream of CLAVATA and SCARECROW genes

(A-D) Relative transcript levels in 12 d old protonemata: *PpAPB1-4* in *Vx::mCherry* (WT) and *Ppnog2-R* (A); *PpCLE4*, *PpCLE5* and *PpCLE7* in WT, and in *Ppnog1-R* and *Ppnog2-R* mutants (B); *PpSCR1* (C) and *PpSCR2* (D) in WT, and in *Ppnog1-R* and *Ppnog2-R* mutants. Statistical analysis: t-test,  $P < 0.05$  \*\*\* (A); ANOVA,  $p < 0.01$  \*\*,  $p < 0.001$  \*\*\* (B-D). See also Figure S6.

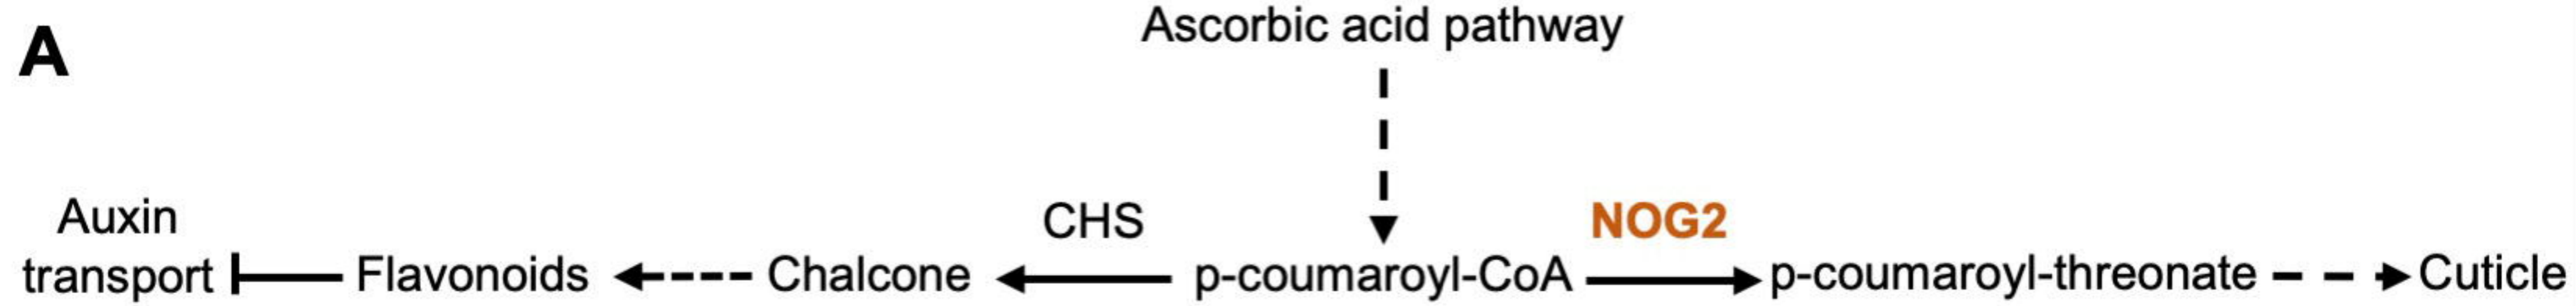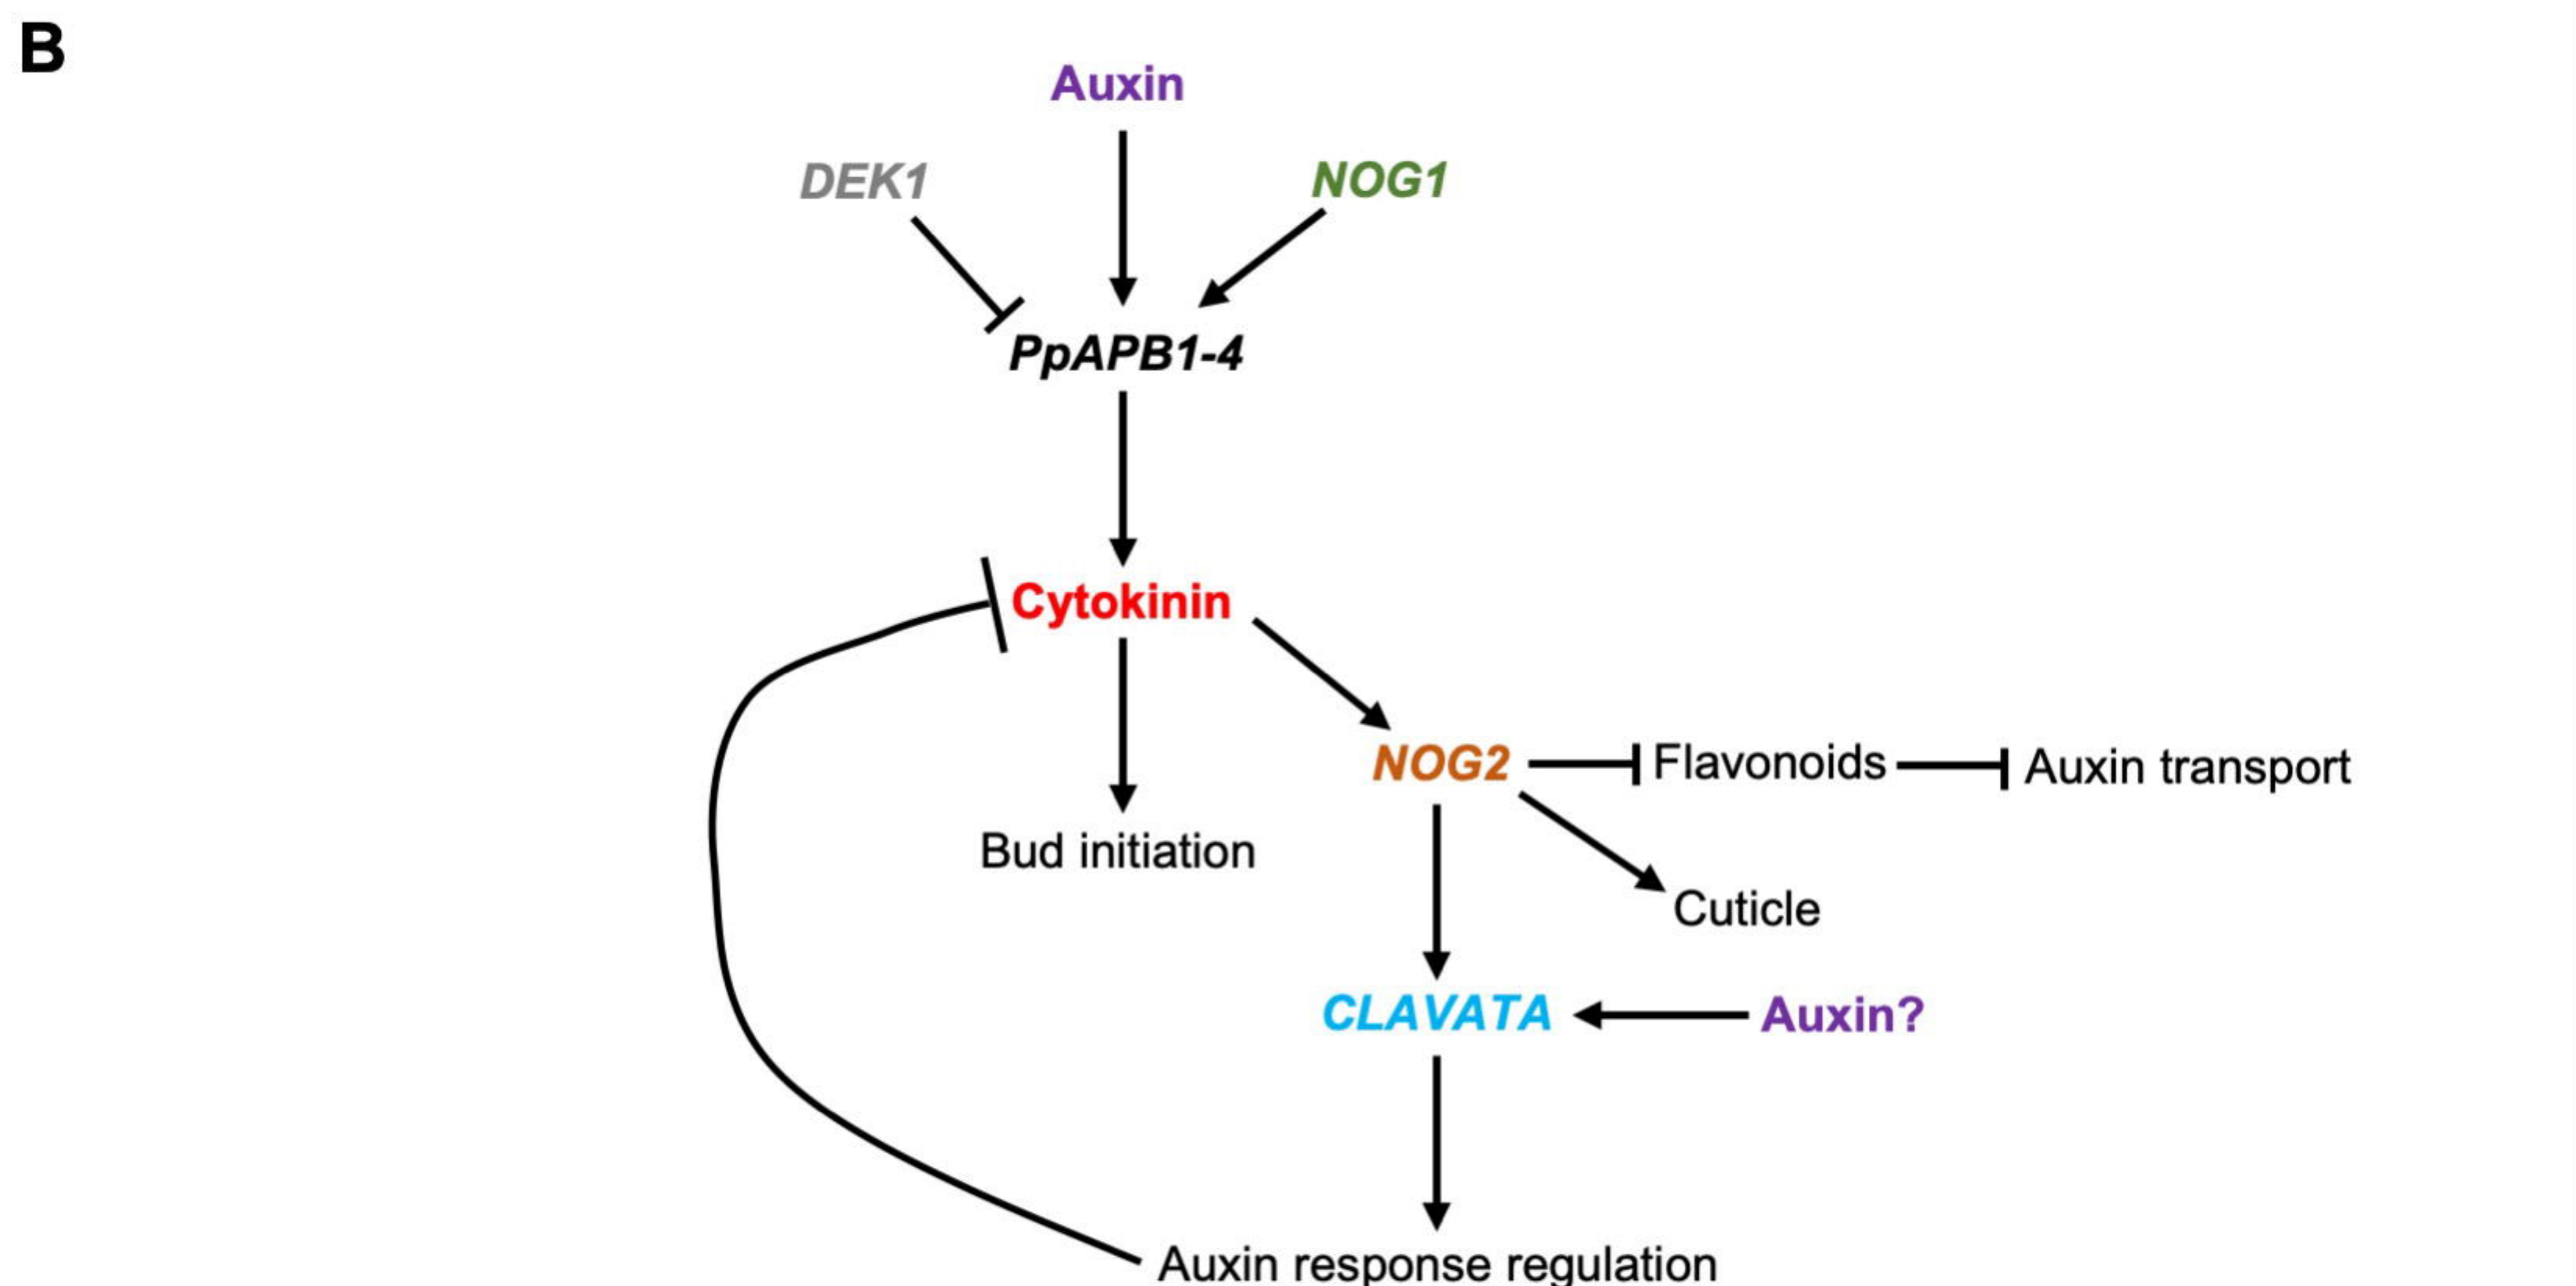

bioRxiv preprint doi: <https://doi.org/10.1101/2020.07.21.213728>; this version posted July 22, 2020. The copyright holder for this preprint (which was not certified by peer review) is the author/funder, who has granted bioRxiv a license to display the preprint in perpetuity. It is made available under aCC-BY 4.0 International license.

### Figure 7. Model for 3D growth regulation in *P. patens*

A) Proposed involvement of PpNOG2 in the ascorbic acid pathway leading to cuticle formation. When PpNOG2 is absent, metabolic flux is directed through to flavonoid biosynthesis through enhanced chalcone synthase (CHS) activity. Increased flavonoids cause inhibition of auxin transport and suppression of the auxin response. B) Model for PpNOG2 function in the context of 3D growth regulation: PpNOG1 and PpDEK1 operate antagonistically to induce the degradation of a repressor of *PpAPB* activity. Activation of cytokinin biosynthesis initiates bud development and induces *PpNOG2* transcription. PpNOG2 then modulates auxin-cytokinin crosstalk, which is dependent on CLAVATA signalling. This ensures that further bud development is prevented, and that division planes within developing buds are correctly oriented.
